1 **Title:** The ER cargo receptor SURF4 facilitates efficient erythropoietin secretion  
2  
3  
4  
5

6 Zesen Lin<sup>a</sup>, Richard King<sup>b</sup>, Vi Tang<sup>c</sup>, Gregory Myers<sup>d</sup>, Ginette Balbin-Cuesta<sup>e,f</sup>, Ann  
7 Friedman<sup>b</sup>, Beth McGee<sup>b</sup>, Karl Desch<sup>e,g</sup>, Ayse Bilge Ozel<sup>h</sup>, David Siemieniaki<sup>i</sup>, Pavan  
8 Reddy<sup>b,e,j</sup>, Brian Emmer<sup>b</sup>, Rami Khoriaty<sup>b,d,e,j,1</sup>.  
9

10  
11  
12 <sup>a</sup>Department of Pharmacology, University of Michigan, Ann Arbor, MI 48109;

13 <sup>b</sup>Department of Internal medicine, University of Michigan, Ann Arbor, MI 48109;

14 <sup>c</sup>Department of Molecular and Integrative Physiology, University of Michigan, Ann

15 Arbor, MI 48109; <sup>d</sup>Department of Cell and Developmental Biology, University of

16 Michigan, Ann Arbor, MI 48109; <sup>e</sup>Cellular and Molecular Biology Program, University

17 of Michigan, Ann Arbor, MI 48109; <sup>f</sup>Medical Scientist Training Program, University of

18 Michigan, Ann Arbor, MI 48109; <sup>g</sup>Department of Pediatrics, University of Michigan,

19 Ann Arbor, MI 48109; <sup>h</sup>Department of Human Genetics, University of Michigan, Ann

20 Arbor, MI 48109; <sup>i</sup>Life Sciences Institute, University of Michigan, Ann Arbor, MI 48109;

21 <sup>j</sup>University of Michigan Rogel Cancer Center, Ann Arbor, MI 48109  
22  
23

24 <sup>1</sup> To whom correspondence should be addressed:  
25

26 Rami Khoriaty, M.D.

27 BSRB room 1524

28 109 Zina Pitcher Pl.

29 Ann Arbor, MI 48109

30 Tel: 734-763-3636

31 Email: [ramikhor@umich.edu](mailto:ramikhor@umich.edu)  
32  
33  
34

35 Keywords: Erythropoietin, SURF4, CRISPR screen  
36

## 1 **Abstract**

2 Erythropoietin (EPO), a glycoprotein produced by specialized peritubular fibroblasts in  
3 the kidney, is the master regulator of erythropoiesis. EPO is secreted into the plasma in  
4 response to tissue hypoxia and stimulates erythroid differentiation and maturation.  
5 Though the transcriptional regulation of EPO has been well studied, the molecular  
6 determinants of EPO secretion remain unknown. Here, we generated a HEK293T  
7 reporter cell line that provides a quantifiable and selectable readout of intracellular EPO  
8 levels. Using this cell line, we performed a genome-scale CRISPR screen that identified  
9 SURF4 as an important mediator of EPO secretion. Targeting *SURF4* with multiple  
10 independent sgRNAs resulted in intracellular accumulation and extracellular depletion  
11 of EPO. Both of these phenotypes were rescued by expression of *SURF4* cDNA.  
12 Additionally, consistent with a role for SURF4 as an ER cargo receptor of EPO, we found  
13 that disruption of SURF4 resulted in accumulation of EPO in the ER compartment, and  
14 that SURF4 and EPO physically interact. Furthermore, SURF4 disruption in Hep3B  
15 cells also caused a defect in the secretion of endogenous EPO, ruling out an artifact of  
16 heterologous overexpression. This work suggests that SURF4 functions as an ER cargo  
17 receptor that mediates the efficient secretion of EPO. Our findings also suggest that  
18 modulating SURF4 may be an effective treatment for disorders of erythropoiesis that  
19 are driven by aberrant EPO levels. Finally, we show that SURF4 overexpression results  
20 in increased secretion of EPO, suggesting a new strategy for more efficient production of  
21 recombinant EPO.

## 1 **Introduction**

2 Approximately one third of the proteins encoded by the mammalian genome are  
3 secretory proteins (1, 2). These proteins traffic from the endoplasmic reticulum (ER) to  
4 the Golgi apparatus via coat protein complex II (COPII) vesicles before reaching their  
5 final destinations: endosomes, lysosomes, plasma membrane, or extracellular space.  
6 COPII vesicles have an inner coat composed of SAR1 and SEC23-SEC24 heterodimers  
7 and an outer coat composed of SEC13-SEC31 heterotetramers (3). Though  
8 transmembrane cargo proteins may directly interact with COPII components, the  
9 physical barrier created by the ER membrane prevents direct interaction between  
10 soluble cargos and the COPII coat. Therefore, soluble cargos either passively flow into  
11 COPII vesicles (bulk flow) or are captured in COPII vesicles through recognition by  
12 intermediary receptors or adaptors (cargo capture) (4).

13 Support for receptor-mediated cargo capture arose from early electron microscopy  
14 studies and *in vitro* assays of cargo packaging in COPII vesicles, which demonstrated  
15 efficient selection and concentration of cargos into COPII vesicles, as well as physical  
16 interactions between soluble cargos and COPII components (4-9). Subsequent studies  
17 uncovered LMAN1 as the first ER cargo receptor that mediates ER export of soluble  
18 cargos in mammals (10-12). LMAN1, together with its adapter MCFD2, form a complex  
19 that is required for the efficient secretion of coagulation factors V and VIII, cathepsins,  
20 and alpha1-antitrypsin (12-16). While a handful of additional interactions between  
21 soluble cargos and ER receptors have been described in mammals (4, 9, 17), the extent  
22 to which bulk flow and cargo capture contribute to recruitment of proteins in COPII  
23 vesicles is unclear. This is primarily due to the fact that ER cargo receptors that are

1 necessary for the efficient secretion of the majority of soluble cargos remain  
2 unidentified.

3 Erythropoietin (EPO) is a glycoprotein that is produced predominantly by specialized  
4 kidney peritubular fibroblasts and secreted into the plasma (18-21). EPO binds to its  
5 receptor expressed on erythroid precursors and promotes cell survival, proliferation,  
6 and differentiation (22-24). EPO plays a crucial role in the regulation of red blood cell  
7 production (erythropoiesis). Failure to make sufficient amounts of EPO, as seen in the  
8 setting of chronic kidney disease, results in anemia. In contrast, supra-physiological  
9 EPO levels, as seen in the context of EPO-secreting tumors, result in polycythemia.  
10 Though the transcriptional regulation of EPO production has been well-studied (25-30),  
11 the molecular basis of EPO trafficking remains poorly understood.

12 In this study, in an effort to identify proteins involved in EPO secretion, we developed a  
13 genome-scale CRISPR/Cas9 knock-out screen that provides a quantifiable and  
14 selectable readout of intracellular EPO levels. This screen, followed by several validation  
15 experiments, identified the ER cargo receptor SURF4 as a key mediator of efficient EPO  
16 secretion. These findings suggest that modulation of SURF4 in the EPO producing cells  
17 could provide a novel strategy for altering plasma EPO levels and therefore regulating  
18 erythropoiesis. Additionally, this report suggests a novel strategy for improving the  
19 efficiency of recombinant EPO production.

## 1 **Results:**

### 2 **Generation of a reporter cell line that allows for a quantifiable and** 3 **selectable readout of intracellular EPO levels**

4 To identify proteins that regulate the intracellular trafficking of EPO, we developed a  
5 genome-scale functional screen that provides a quantifiable and selectable readout of  
6 intracellular EPO accumulation. Therefore, we generated a reporter HEK293T cell line  
7 stably expressing eGFP-tagged EPO (EPO-eGFP) and, as an internal control, mCherry-  
8 tagged alpha1-antitrypsin (A1AT-mCherry) (Fig. 1A). This cell line is herein referred to  
9 as the EPO-eGFP/A1AT-mCherry reporter cell line or just as the reporter cell line.  
10 Importantly, EPO-eGFP and A1AT-mCherry are equally expressed from the same CMV  
11 promoter, with their respective coding sequences separated by a sequence encoding a  
12 P2A peptide (Fig. 1A).

13 We found that both EPO and A1AT are efficiently secreted from the reporter cell line  
14 (Fig. 1 B and C) and that disruption of ER-to-Golgi transport with Brefeldin A results in  
15 intracellular accumulation of EPO and A1AT (Fig. 1D). Deletion of the ER cargo receptor  
16 for A1AT, *LMAN1*, resulted in intracellular accumulation of A1AT, as expected, with no  
17 effect on intracellular EPO (Fig. 1E), ruling out a role for *LMAN1* in EPO secretion.  
18 These studies demonstrate that the machinery required for the efficient secretion of  
19 EPO via the classical secretory pathway is intact in this cell line and establish the utility  
20 of this cell line to identify modifiers of intracellular EPO levels.

### 21 **A CRISPR/Cas9 loss-of-function screen identified SURF4 as a putative** 22 **regulator of intracellular EPO level**

1 To identify proteins that affect EPO secretion, we mutagenized the EPO-eGFP/A1AT-  
2 mCherry reporter cell line with a CRISPR/Cas9 knockout library (hGeCKO-v2), which  
3 delivers SpCas9, a puromycin resistance cassette, and a pooled collection of 123,411  
4 single guide RNAs (sgRNAs) that include 6 sgRNAs targeting nearly every gene in the  
5 human genome. Transduction of the library was performed at a low multiplicity of  
6 infection (MOI ~0.3), such that most infected cells receive 1 sgRNA to mutate 1 gene in  
7 the genome. Puromycin selection was applied from days 1-4 post-transduction. After an  
8 additional 9 days, cells with normal mCherry but increased (top ~7%) or decreased  
9 (bottom ~7%) eGFP fluorescence were isolated (Fig. 2A). This cell sorting strategy  
10 allows the identification of genes that affect EPO but not A1AT levels, therefore reducing  
11 the likelihood of identifying genes that affect global protein secretion. Integrated sgRNA  
12 sequences were quantified by deep sequencing and analyzed for their enrichment in the  
13 eGFP high compared to the eGFP low population.

14 This screen, performed in biological triplicates, identified that the sgRNA sequences  
15 targeting only one gene, surfeit locus protein 4 (*SURF4*), are enriched in the eGFP high  
16 population compared to the eGFP low population at an FDR <10% (Fig. 2B). Five out of  
17 six sgRNAs targeting *SURF4* were significantly enriched in the eGFP high population  
18 (Fig. 2 C and D).

### 19 ***SURF4* deletion results in intracellular accumulation and reduced secretion** 20 **of EPO**

21 To validate the results of the screen, we targeted *SURF4* with one sgRNA (sgRNA1) that  
22 showed significant enrichment in the whole genome screen (Fig. 2D) and a second  
23 sgRNA (sgRNA2) not included in the hGeCKO-v2 library. *SURF4* mutagenesis with

1 sgRNA1 or sgRNA2 was highly efficient, resulting in insertions or deletions (indels) in  
2 ~97% and 77% of alleles, respectively (Fig. 3A). Cells transduced with *SURF4* sgRNA1 or  
3 sgRNA2 exhibited increased intracellular accumulation of EPO-eGFP, with no effect on  
4 A1AT-mCherry (Fig. 3 B and C). This finding was confirmed in 3 independent EPO-  
5 eGFP/A1AT-mCherry reporter cell clones (Fig. 3D), ruling out an artifact unique to the  
6 clone used in the original screen.

7 To further confirm a direct effect of *SURF4* deficiency on intracellular EPO  
8 accumulation, we next generated 3 clonal reporter cell lines with confirmed frameshift  
9 mutations of both *SURF4* alleles, by transient expression of *SURF4* sgRNA1 (*SI*  
10 *Appendix*, Fig. S1). The increased intracellular EPO protein levels observed in *SURF4*  
11 deleted cells was completely rescued by a lentivirus expressing wildtype *SURF4* cDNA  
12 (Fig. 3 E and F), ruling out an off-target effect shared by sgRNA1 and sgRNA2. Taken  
13 together, these findings demonstrate that *SURF4* disruption results in intracellular  
14 accumulation of EPO.

15 To rule out an indirect effect on EPO-eGFP secretion resulting from an interaction  
16 between eGFP and *SURF4*, we analyzed the dependence of FLAG-tagged EPO on *SURF4*  
17 for secretion. We generated a wildtype and a *SURF4* deficient HEK293 cell line  
18 expressing FLAG-tagged EPO (EPO-FLAG) from a tetracycline-inducible promoter (Fig.  
19 4A). Following tetracycline administration, the intracellular EPO accumulation was  
20 significantly more pronounced in *SURF4*-deficient compared to wildtype cells (Fig. 4B),  
21 recapitulating the findings described above with EPO-eGFP and ruling out an indirect  
22 effect due to the eGFP tag.

1 SURF4 localizes to the ER membrane (31-33) and functions as an ER cargo receptor,  
2 suggesting that the increased accumulation of intracellular EPO in the setting of SURF4  
3 deficiency is secondary to reduced EPO secretion. Consistent with this hypothesis, the  
4 extracellular EPO-FLAG protein level was considerably lower in the conditioned media  
5 of SURF4-deleted cells compared to wildtype cells (Fig. 4 B and C), as was the ratio of  
6 extracellular to intracellular EPO-FLAG levels (Fig. 4D). The latter findings observed in  
7 SURF4-deficient cells were rescued by stable expression of *SURF4* cDNA (Fig. 4 B and  
8 C). These results indicate that disruption of *SURF4* results in a defect in EPO secretion.

### 9 ***SURF4* deletion results in accumulation of EPO in the ER**

10 We next performed live cell fluorescent confocal microscopy to determine the  
11 localization of accumulated EPO in the setting of *SURF4* deletion. We co-transfected the  
12 EPO-eGFP/A1AT-mCherry reporter construct (Fig. 1A) with a vector expressing an ER  
13 blue fluorescent marker (ERoxBFP) into wildtype or SURF4 deficient (*SI Appendix*, Fig.  
14 S1) HEK293 cells. We quantified the degree of co-localization between EPO and  
15 ERoxBFP (as well as A1AT and ERoxBFP, as control) by Pearson correlation coefficient  
16 (PCC). SURF4 deficient cells exhibited an increased co-localization of EPO (but not  
17 A1AT) with ERoxBFP compared to wildtype cells (PCC 0.7870 in *SURF4* deleted cells  
18 versus 0.2934 in wildtype cells,  $p < 0.0001$ ) (Fig. 5 A and B).

19 To confirm the ER accumulation of EPO upon *SURF4* disruption, we tested the  
20 glycosylation status of EPO in SURF4-deficient cells. EPO contains 3 N-glycosylation  
21 sites. In the ER, N-linked high mannose oligosaccharides are added to EPO and further  
22 modifications are made in the Golgi apparatus. The ER form of EPO is cleavable by  
23 EndoH, but the post-ER form is not. Therefore, the ratio of EndoH cleaved to EndoH



1 uncleaved EPO will approximate the ratio of the amount of EPO in the ER versus the  
2 amount of EPO in the Golgi apparatus or beyond. In SURF4 deficient cells, the ratio of  
3 ER/post-ER form of EPO was significantly increased compared to that in wildtype cells  
4 (Fig. 5 C and D and *SI Appendix*, Fig. S2), an effect that was decreased by stable  
5 expression of *SURF4* cDNA (Fig. 5 C and D). Taken together, these results demonstrate  
6 that SURF4 promotes the efficient ER exit and secretion of EPO.

### 7 **SURF4 physically interacts with EPO**

8 To determine if SURF4 binds to EPO, we tested for reciprocal co-immunoprecipitation  
9 of SURF4-FLAG and EPO-GFP in HEK293T cells. An antibody against the FLAG  
10 epitope co-immunoprecipitated EPO-eGFP but not the ER luminal resident protein  
11 calnexin. Similarly, an antibody against GFP co-immunoprecipitated FLAG-SURF4 (Fig.  
12 5E). These results are consistent with a specific physical interaction between SURF4 and  
13 EPO.

14 TPO shares significant sequence homology with EPO. To test if TPO, similarly to EPO,  
15 depends on SURF4 for efficient secretion, we generated 2 independent clonal HEK293  
16 cells stably expressing and efficiently secreting TPO-eGFP and A1AT-mCherry (Fig. 6 A  
17 and B). Like A1AT, TPO did not accumulate intracellularly upon *SURF4* deletion (Fig. 6  
18 C and D). These findings demonstrate the specificity of SURF4 for promoting EPO  
19 secretion and suggest that the SURF4/EPO interaction is mediated by one of the EPO  
20 domains not present in TPO.

### 21 ***SURF4* promotes the secretion of endogenous EPO**

22 The experiments described above were performed in a heterologous cell line  
23 overexpressing EPO fused to either an eGFP or a FLAG tag. To test the impact of *SURF4*

1 deletion on the secretion of endogenous EPO, we transduced human HEP3B cells with  
2 *SURF4*-targeting sgRNAs or control sgRNAs. As a positive control, a sgRNA targeting  
3 *EPO* resulted in profound reduction of extracellular EPO level to almost an undetectable  
4 (0.45% of control) level (Fig. 7). Disruption of *SURF4* in HEP3B cells using 2  
5 independent sgRNAs resulted in a significant reduction (51.22% of control) of  
6 extracellular EPO levels compared to cells transduced with control sgRNAs (Fig 7).

### 7 ***SURF4* overexpression promotes more efficient EPO secretion**

8 We next determined if *SURF4* overexpression promotes more efficient EPO secretion.  
9 We generated a lentivirus expressing equal amounts of *SURF4* and *Katushka2S*  
10 (*SURF4*-p2A-*Katushka2S*, Fig. 8A) and transduced it into HEK293 cells expressing  
11 *EPO*-FLAG from a tetracycline inducible promoter. Cells with the highest (top 10%) and  
12 lowest (bottom 10%) *SURF4* expression, as determined by *Katushka2* fluorescence, were  
13 FACS sorted. Following tetracycline administration, EPO level was found to be  
14 significantly increased in the conditioned media of cells overexpressing *SURF4*  
15 compared to cells expressing low *SURF4*, with the reverse pattern observed  
16 intracellularly (Fig. 8 B-D).

17 To assess the impact of *SURF4* overexpression on the secretion of EPO expressed from  
18 its endogenous genomic locus, we performed the same experiment described above in  
19 HEP3B cells. EPO level was increased in the conditioned media of cells expressing high  
20 compared to low *SURF4* levels (Fig. 8E). Taken together, these results demonstrate that  
21 *SURF4* overexpression promotes more efficient EPO secretion.

## 1 **Discussion**

2 In this report, we developed an unbiased genome-scale loss-of-function screen and  
3 identified *SURF4* as a regulator of intracellular EPO levels. Deletion of *SURF4* resulted  
4 in intracellular accumulation and extracellular depletion of EPO. Overexpression of  
5 *SURF4* resulted in the reversed pattern. Consistent with the reported localization of  
6 *SURF4* at the ER membrane (32, 34, 35), we found that disruption of *SURF4* resulted in  
7 accumulation of EPO in the ER, and that EPO and *SURF4* physically interact. Taken  
8 together, these results strongly suggest that *SURF4* is the ER cargo receptor that  
9 mediates the efficient secretion of EPO.

10 The screen described above was performed in a cell line with heterologous  
11 overexpression of EPO under the control of a CMV promoter. Therefore, it was  
12 important to examine if *SURF4* facilitates the secretion of EPO when expressed at a  
13 more physiological level. Accordingly, we deleted *SURF4* in HEP3B cells which were  
14 induced to express EPO from its endogenous genomic locus, and found that *SURF4* also  
15 promotes EPO secretion under these conditions.

16 *SURF4* is the mammalian ortholog of yeast Erv29p. Erv29p facilitates packaging of pro-  
17 alpha-factor in COPII vesicles promoting their ER-to-Golgi transport (31, 36, 37).  
18 Erv29p recycles back from Golgi-to-ER via recognition of its well-conserved di-lysine  
19 sorting signal by the COPI coat (38). In mammalian cells, only a handful of cargos  
20 (APOB, PCSK9, DSSP, AMLEX, and GH) have been shown to depend on *SURF4* for  
21 efficient secretion (32, 33, 39). However, a recent report demonstrated that mice with  
22 germline deletion of *Surf4* exhibit early embryonic lethality (40) similar to *C. elegans*  
23 (33), suggesting the presence of one or more *SURF4*-dependent cargos with a critical

1 function during embryogenesis. Future studies aimed at identifying the repertoire of  
2 cargos that depend on SURF4 for secretion are essential.

3 A recently published report suggested that the cargo proteins that depend on SURF4 for  
4 secretion contain an N-terminal tripeptide ‘ER-ESCAPE’ motif (39). This motif is  
5 exposed following removal of the leader sequences and is recognized by SURF4 (39).  
6 However, an N-terminal ‘ER-ESCAPE’ motif with high SURF4 binding affinity is not  
7 present in EPO. Additionally, we found that EPO, but not TPO, depends on SURF4 for  
8 efficient secretion. However, TPO has an N-terminal motif with a better predicted  
9 SURF4 binding affinity than EPO. These results suggest that the N-terminal ‘ER-  
10 ESCAPE’ motif may not be a generalizable determinant of SURF4 interaction for all  
11 SURF4-dependent cargos.

12 Soluble cargos are exported from the ER via the passive “bulk flow” or the concentrative  
13 “cargo capture” processes, with several lines of evidence supporting one route versus the  
14 other(4). Though “bulk flow” and “cargo capture” are not mutually exclusive, this report  
15 provides support for the “cargo capture” model of EPO secretion. However, it is  
16 important to note that in our experimental conditions, ~50-70% of extracellular EPO is  
17 reduced in the setting of SURF4-deficiency. Therefore, the secretion of the remaining  
18 EPO depends on either bulk flow or one or more separate and unidentified receptors.

19 Recent developments in genome engineering using CRISPR/Cas9 technology have  
20 dramatically enhanced the potential and efficacy of comprehensive, high throughput  
21 genetic screens (41-55). Such strategies can be applied *in vitro* and *in vivo* to discover  
22 novel biologic insights. Our screen was designed to focus on post-transcriptional  
23 regulators of EPO by placing its expression under the control of a CMV promoter.

1 Screening strategies similar to the one employed in this manuscript and in a recently  
2 published report (32) might help identify additional ER cargo receptors for other soluble  
3 secreted proteins, and shed more light into the extent of the contribution of “cargo  
4 capture” to recruitment of cargos into COPII vesicles.

5 Findings in this report may have important implications for erythropoiesis. EPO, the  
6 master regulator of erythropoiesis, is produced by specialized peritubular fibroblasts in  
7 the kidney. The transcriptional control of EPO via the hypoxia inducible factor pathway  
8 has been well studied (28, 56-65) culminating in the development of prolyl hydroxylase  
9 inhibitors, a class of compounds that increase EPO production at the transcriptional  
10 level via activation of the hypoxia inducible factor (66-73). These drugs are currently in  
11 clinical development, with several compounds in advanced phase 2 or 3 trials (74-78);  
12 however, there are numerous potential concerns and adverse effects of these drugs,  
13 including possible increased risks of malignancy and autoimmune disease (79-81).  
14 Similar to the transcriptional control of EPO, the intracellular signal transduction  
15 pathway downstream of the EPO receptor has also been well studied(82-84). In  
16 contrast, much less is known about the molecular basis of EPO trafficking. Our findings  
17 suggest that modulating SURF4 may be effective for the treatment of disorders of  
18 erythropoiesis that are driven by aberrant EPO levels (85-90). Though a handful of  
19 other cargos depend on SURF4 for their secretion (32, 33, 39), with additional cargos  
20 likely remaining to be identified, targeting SURF4 exclusively in the EPO producing cells  
21 might alter plasma EPO levels and therefore regulate erythropoiesis without affecting  
22 other SURF4-dependent cargos that are expressed in other cells. Alternatively, an  
23 inhibitor that specifically disrupts the SURF4-EPO interaction would also be expected to  
24 have no effects on other cargos that bind SURF4.

1 Recombinant human EPO (rhEPO) is used clinically for the treatment of anemia due to  
2 chronic kidney disease, chemotherapy, or zidovudine. rhEPO is also used to reduce the  
3 requirement of allogeneic red blood cell transfusion following certain elective surgeries.  
4 Though the use of rhEPO is indicated in only a subset of the above clinical scenarios, the  
5 rhEPO market size was valued at ~7.4 billion US dollars in 2016 (91). In this report, we  
6 demonstrate that SURF4 overexpression results in enhanced EPO secretion. This  
7 approach could be applied to increase the efficiency of rhEPO production, which might  
8 translate into reduced costs of this drug.

## 1 **METHODS:**

### 2 **Cell culture**

3 HEK293T and HEP3B cells were purchased from ATCC. Flp-In T-REx 293 cells were  
4 purchased from Invitrogen. HEK293T and Flp-In T-REx 293 cells were cultured in  
5 DMEM (Gibco) supplemented with 10% heat-inactivated fetal bovine serum (Peak) and  
6 1% penicillin-streptomycin (Gibco). HEP3B cells were cultured in alpha-MEM (Gibco)  
7 supplemented with 2mM L-glutamine (Gibco), 10% heat-inactivated fetal bovine serum  
8 (Peak), and 1% penicillin-streptomycin (Gibco). All cells were grown in a humidified  
9 37°C incubator with 5% CO<sub>2</sub>.

### 10 **Generation of the EPO-GFP A1AT-mCherry reporter cell line**

11 The CMV-EPO-eGFP-p2A-A1AT-mCherry construct was assembled using the NEBuilder  
12 HiFi DNA assembly cloning kit (NEB) using vector sequences derived from PCSK9-  
13 eGFP-p2A-A1AT-mCherry (32) and EPO cDNA obtained from Dharmacon. HEK293T  
14 cells were transfected with CMV-EPO-eGFP-p2A-A1AT-mCherry using Fugene HD  
15 transfection reagent (Promega). Transfected cells were selected with 350µg/mL  
16 hygromycin (Invitrogen). Five weeks following hygromycin selection, single cells were  
17 sorted into 96-well plates using a SY-3200 flow cytometer (Sony). Single cell clones  
18 were expanded and analyzed for stable expression of EPO-eGFP and A1AT-mCherry  
19 using a LSR Fortessa flow cytometer (BD Bioscience).

### 20 **Generation of the TPO-GFP A1AT-mCherry reporter cell line**

21 The TPO cDNA sequence was amplified from human liver RNA (de-identified tissue  
22 sample obtained from the tissue procurement core, University of Michigan, IRB

1 #HUM00048303) and the CMV-TPO-eGFP-p2A-A1AT-mCherry construct was  
2 generated and transfected into HEK293T cells as described in the paragraph above.  
3 Single cell clones were sorted, expanded, and analyzed for stable expression of TPO-  
4 eGFP and A1AT-mCherry, as described above.

### 5 **Expansion and lentiviral preparation of the pLentiCRISPRv2 library**

6 The pLentiCRISPRv2 whole genome CRISPR library was obtained from Addgene  
7 (Addgene #1000000048, a gift from Feng Zhang (41)), expanded by 16 electroporations  
8 (8 for each half library) into Endura electrocompetent cells (Lucigen), and plated on  
9 sixteen 24.5 cm bioassay plates (ThermoFisher Scientific). Following a 12-14 hour  
10 incubation at 37C, colonies were harvested from agar plates, and pooled plasmids for  
11 each half library were isolated separately by Maxipreps using an EndoFree Plasmid  
12 Maxi Kit (Qiagen). To prepare the pooled lentiviral library, 11.3 ug of each half library  
13 was co-transfected with 17 ug of psPAX2 (Addgene #12260, a gift from Didier Trono)  
14 and 11.3 ug of pCMV-VSV-G (addgene #8454, a gift from Robert Weinberg (92)) using  
15 Lipofectamine LTX with PLUS reagent (ThermoFisher Scientific) into each of six T225  
16 tissue culture flasks (ThermoFisher Scientific) containing HEK293T cells at ~80-90%  
17 confluency. Media was changed 24 hours post-transfection, and viral supernatant was  
18 collected 12, 24, and 36 hours afterwards. Media containing viral supernatant was  
19 centrifuged at 500 g for 5 min, pooled, aliquoted, snap-frozen in liquid nitrogen, and  
20 stored at -80C.

### 21 **CRISPR/Cas9 loss-of-function genome wide screen**

22 For each independent screen, more than 142 million reporter cells were plated in 15-cm  
23 tissue-culture dishes (Corning) at 30% confluency. Cells were transduced with the



1 lentiviral library (with 8ug/ml polybrene, Sigma) at a multiplicity of infection (MOI) of  
2 ~0.3. Twenty-four hours post-viral transduction, puromycin selection (1 ug/ml, Sigma)  
3 was applied for 4 days. Subsequently, cells were kept at a logarithmic phase of growth  
4 and passaged every 2-3 days, maintaining more than 36 million cells in culture at all  
5 times in order to preserve library depth. Fourteen-days post-transduction, ~80 million  
6 cells were isolated from tissue culture dishes using trypsin 0.25% (Gibco), pelleted by  
7 centrifugation (350g, 4C, 5 min), resuspended in cold PBS + 2% FBS, and filtered  
8 through a 35 um mesh into flow cytometry tubes (Corning). Cells were divided into 20  
9 tubes and maintained on ice until sorting. Cells with normal mCherry fluorescence (mid  
10 70-80% fluorescence) and top or bottom ~7% eGFP fluorescence (~4 million  
11 cells/population) were sorted using a BD FACSAria III (BD Biosciences) and collected  
12 into 15 ml polypropylene tubes (Cellstar) containing media. Genomic DNA was  
13 extracted using a DNeasy Blood & Tissue kit (Qiagen), and integrated lentiviral sgRNA  
14 sequences were amplified by a two-step PCR reaction (20 cycles and 14 cycles,  
15 respectively) as previously described (32, 41) using a Herculase II Fusion DNA  
16 Polymerase kit (Agilent biotechnologies). DNA was purified after each of the PCR  
17 reactions using a QIAquick PCR purification kit (Qiagen). Following the 2 step PCR,  
18 DNA was analyzed with a bioanalyzer (Agilent) and the sgRNA amplicons were  
19 sequenced using a NextSeq 500 Sequencing System (Illumina). On average, 23.5 million  
20 reads were generated for each sorted cell population of each screen. Overall, 98% of the  
21 reads had a per sequence quality score (phred-based base quality score) of greater than  
22 30. 104,331 sgRNA sequences were mapped and identified (along with the barcode  
23 corresponding to each cell population of each replicate) using a custom Perl Script as

1 previously described (32). Enrichment at the sgRNA and gene levels was analyzed using  
2 DESeq2 and MAGeCK, respectively (93, 94).

### 3 **Disruption of candidate genes using CRISPR/Cas9**

4 sgRNAs targeting several genes and several non-targeting sgRNAs (listed in *SI*  
5 *Appendix*, Table S1) were cloned into the pLentiCRISPRv2 plasmid (Addgene:52961, a  
6 gift from Feng Zhang (41) as previously described (42). pLentiCRISPR plasmids were  
7 packaged into Lentivirus, using the same method described above. To disrupt genes in a  
8 population of cells, cells were transduced with lentivirus at an MOI of ~0.3.  
9 Subsequently, transduced cells were selected with puromycin and passaged for 10-14  
10 days prior to FACS analysis. For all validation experiments, a minimum of 3 biologic  
11 replicates were analyzed.

### 12 **Generation of SURF4-deficient clonal cell lines**

13 To generate clonal cell lines that are deficient for SURF4, a sgRNA targeting *SURF4*  
14 exon 2 (*SI Appendix*, Table S1) was cloned into the PX459 plasmid (Addgene: 62988, a  
15 gift from Feng Zhang) as previously described (95), and the construct was transiently  
16 transfected into cells using Fugene HD transfection reagent (Promega). Twenty-four  
17 hours post-transfection, puromycin (1ug/mL, Sigma) selection was applied for 3 days,  
18 and subsequently, single cells were sorted into each well of three 96-well plates using  
19 the SY-3200 flow cytometry instrument (Sony). Following expansion of the single cell  
20 clones, genomic DNA was extracted with QuickExtract (Epicentre) and indels were  
21 determined by amplification of the sgRNA target site by polymerase chain reaction  
22 using Herculase II Fusion DNA Polymerase (Agilent biotechnologies) and Sanger  
23 sequencing. Primers used for PCR and Sanger sequencing are listed in *SI Appendix*,

1 Table S1. Three independent single cell clones with homozygous frameshift indels in  
2 *SURF4* were generated.

### 3 **Flow Cytometry analysis**

4 HEK293T cells were detached with 0.25% trypsin (Gibco), washed with PBS, collected  
5 by centrifugation (350 g, 5 min, 4C), resuspended in cold PBS with 0.1% BSA and 10mM  
6 HEPES (Invitrogen), filtered with 70  $\mu$ m cell strainers, and analyzed by BD LSR  
7 Fortessa (BD Bioscience). FlowJo (Tree Star) was used to calculate the mean  
8 fluorescence intensity and for further analysis.

### 9 **Brefeldin A treatment**

10 HEK293 cells stably expressing EPO-eGFP and A1At-mCherry were incubated with  
11 1 $\mu$ g/mL Brefeldin A (Biolegend) for 12 hr. Subsequently, cells were collected as  
12 described above and analyzed by flow cytometry for intracellular accumulation of EPO-  
13 eGFP and A1AT-mCherry.

### 14 **Western blots**

15 To prepare cell lysates, cells were washed in PBS, suspended in RIPA buffer (Invitrogen)  
16 supplemented with cOmplete protease inhibitor cocktail (Sigma), briefly sonicated, and  
17 incubated for 30 minutes in the cold room with end-over-end rotation. Cell lysates were  
18 cleared by centrifugation to remove cell debris (20,000 g, 30 min, 4C) and were  
19 analyzed immediately or stored at -80C until analysis. Protein quantification was  
20 performed using Pierce BCA protein assay kit (ThermoFisher Scientific) per  
21 manufacturer's instruction. Lysates were boiled for 5 min at 95C with 4X Laemmli  
22 sample buffer (Bio-Rad) supplemented with  $\beta$ -mercaptoethanol. Equal amounts of

1 proteins were loaded on either a 4-12% Bis-Tris gel or a 4-20% Tris-Glycine gel  
2 (Invitrogen), and SDS gel electrophoresis was performed as previously described (96,  
3 97). Proteins were then transferred onto a nitrocellulose membrane (Bio-Rad).  
4 Following blocking in 5% (wt/vol) milk-Tris-buffered saline with Tween (TBST),  
5 membranes were incubated with primary antibody at 4C overnight, washed 3 times in  
6 TBST, probed with peroxidase-coupled secondary antibodies, washed again 3 times in  
7 TBST, and developed with SuperSignal West Pico Plus (ThermoFisher Scientific). For  
8 HRP-conjugated primary antibodies, nitrocellulose membranes were incubated with  
9 these antibodies and immediately developed following 3 TBST washes. Densitometry  
10 was performed with ImageJ. To test for the secretion efficiency of various cargo  
11 proteins, cells were seeded at equal densities in 6-well plates or 10-cm plates, and  
12 conditioned media was collected at different time points, cleared by centrifugation (500  
13 g, 5 min, 4C), and analyzed immediately (by western blot) as described above, or stored  
14 at -80C until analysis.

## 15 **Antibodies**

16 The following antibodies were used for immunoblotting: Anti-GFP (Abcam, ab290),  
17 anti-mCherry (Abcam, ab167453), anti-Calnexin (Cell Signaling, 2679S), anti-GAPDH  
18 (Millipore, MAB374), horseradish peroxidase (HRP) conjugated anti-FLAG (Abcam,  
19 ab1238), anti-alpha-tubulin (Abcam, ab176560), HRP conjugated anti-mouse IgG  
20 (Biorad, 1706516) and HRP conjugated anti-rabbit IgG (Jackson ImmunoResearch  
21 Laboratories, 111-035-003).

## 22 **Tetracycline induced EPO-FLAG expression**

1 The coding sequence of EPO with a C-terminal Flag was cloned into pDEST-pcDNA5-  
2 BirA-FLAG (Invitrogen) using NEBuilder HiFi DNA assembly cloning kit (NEB).  
3 Wildtype, SURF4-deficient (with homozygous frameshift *SURF4* indels), or SURF4-  
4 rescue (with homozygous frameshift *SURF4* indels but with stable expression of *SURF4*  
5 cDNA) Flp-In T-REx HEK293 cells with tetracycline-inducible expression of EPO-FLAG  
6 were generated as previously described (98). To induce the expression of EPO-FLAG,  
7 tetracycline (1 ug/mL) was added to the media. Cells and media were collected prior to  
8 the addition of tetracycline and 12- and 24-hours following tetracycline. Intracellular  
9 and extra-cellular EPO levels were analyzed by western blot as described above.

#### 10 **Endoglycosidase H (EndoH) assay**

11 HEK293T cells that are either wild-type, SURF4-deficient, or SURF4-rescue (defined in  
12 the paragraph above) were transfected with a plasmid expressing EPO-eGFP. Thirty-six  
13 hours post-transfection, total cell lysates were prepared, and protein quantification was  
14 performed, both as described above. Lysates were incubated with denaturing buffer  
15 (NEB) 95°C for 10 minutes and equal amounts of lysates (180 ug) were treated with  
16 either 1uL of EndoH (NEB), PNGase F (NEB), or DMSO as control for 1 hour (37°C).  
17 Subsequently, Laemmli buffer (Bio-RaD) was added and the samples were boiled (95°C)  
18 for 5 min. Samples were loaded on a 4-12% Bis-Tris Gel (Invitrogen) and Western blot  
19 was performed as described above. This experiment was performed in biologic  
20 triplicates.

#### 21 **Live cell confocal fluorescent microscopy**

22 Wild-type or SURF4-deficient HEK293T cells that stably express EPO-eGFP and A1AT-  
23 mCherry were transfected with a plasmid expressing ERoxBFP (Addgene: 68126, a gift

1 from Erik Snapp (99)). Twenty-four hours post-transfection, cells were seeded on Lab-  
2 Tek Chambered Coverglass (ThermoFisher). Fluorescent images were captured on a  
3 Nikon A2 confocal microscope. To quantify colocalization between 2 proteins, Pearson  
4 correlation coefficient was calculated using the Nikon Elements software. This  
5 experiment was performed and analyzed by an investigator blinded to the genotype of  
6 the cells.

### 7 **Co-immunoprecipitation**

8 Flp-In T-Rex 293 cells that are either wild-type, SURF4-deficient, or SURF4-rescue  
9 (defined above) were transfected with CMV-EPO-eGFP-p2A-A1AT-mCherry using  
10 Fugene HD transfection reagent (Promega). Twenty-four hours post-transfection, cells  
11 were washed with PBS and incubated in PBS containing 2 mM dithiobis (succinimidyl  
12 propionate) (Pierce) for 30 min at room temperature. Subsequently, 20 mM Tris-HCL  
13 (pH 7.5) was added to quench the reaction. Cells were then washed twice in PBS and cell  
14 lysis was performed with the following lysis buffer (100 mM tris, 10% glycerol, 1% NP-  
15 40, 130 mM NaCl, 5 mM MgCl<sub>2</sub>, 1 mM NaF and 1mM EDTA, supplemented with  
16 cOmplete protease inhibitor cocktail pH 7.5). Cell lysates were collected as described  
17 above and incubated overnight at 4C with either anti-FLAG M2 magnetic beads (Sigma)  
18 or GFP-Trap beads (ChromoTek). Following 5 washes with lysis buffer, proteins were  
19 eluted from the beads via incubation with 2X Laemmli sample buffer containing  $\beta$ -  
20 mercaptoethanol for 15 minutes at room temperature.

### 21 **Generation of cell lines expressing low or high SURF4 levels**

22 A construct expressing SURF4 and the Katushka2S fluorescent marker (PGK-SURF4-  
23 p2A-Katushka2S) was assembled with the NEBuilder HiFi DNA assembly cloning kit

1 (NEB) using vector sequence derived from LV1-5 (Addgene #68411) and cDNAs of  
2 *SURF4* and *Katushka2S* (a gift from Gary Luker(100)). The construct was packaged into  
3 lentivirus as described above and transduced at MOI of ~1 into Flp-In T-REx 293 or  
4 HEP3B cells. Transduced cells were selected with puromycin and passaged for 14 days  
5 prior to FACS sorting. Cells with top and bottom 10% *Katushka2S* fluorescence we  
6 sorted.

### 7 **Generation of *SURF4*-deficient HEP3B cells**

8 Wild-type HEP3B cells were transduced with lentiviral sgRNA targeting *SURF4*, control  
9 sgRNA (combination of non-targeting sgRNAs and sgRNAs targeting genes that do not  
10 affect EPO: *BCL11A*, *MPL*, *SERPINA1*), or sgRNA targeting *EPO* as a positive control.  
11 Cells were selected with puromycin and passaged for at least two weeks prior to further  
12 analysis. EPO levels in the conditioned media were compared between *SURF4* deleted  
13 cells and control cells, correcting for the total cell number at the time of EPO  
14 measurement. Genomic DNA was extracted from HEP3B cells using QuickExtract  
15 (Epicentre).

### 16 **EPO ELISA**

17 Equal numbers of cells were seeded in 6-well or 24-well plates. For HEP3B cells, EPO  
18 production was stimulated with  $\text{CoCl}_2$  (75  $\mu\text{M}$ , Sigma) for 24 hours and conditioned  
19 media was collected and cleared by centrifugation (500 g, 5 min, 4C). For Flp-In T-Rex  
20 HEK293 cells with tetracycline-inducible expression of EPO-FLAG, tetracycline  
21 (1 $\mu\text{g}/\text{mL}$ ) was added for 12 hours and conditioned media was collected, cleared by  
22 centrifugation (500 g, 5 min, 4C) and diluted 1:500. EPO level was measured in the

1 conditioned media using the LEGEND MAX Human Erythropoietin ELISA kit  
2 (Biolegend), according to manufacturer's instructions.

### 3 **Statistical analysis**

4 CRISPR screen data analysis was performed as described above. The statistical  
5 differences in mean fluorescence intensity between EPO-eGFP and A1AT-mCherry were  
6 compared by two-way ANOVA. The difference in extracellular EPO-FLAG level amongst  
7 wild-type, SURF4-deficient, and SURF4-rescued Flp-In T-REx 293 cells were compared  
8 by two-way ANOVA. The Pearson correlation coefficient differences between wildtype  
9 and SURF4 deficient HEK293T cells were compared by unpaired t-test. The statistical  
10 difference in extracellular EPO detected by EPO ELISA was assessed using an unpaired  
11 t-test. The difference in relative amount of EndoH sensitive EPO amongst wildtype,  
12 SURF4-deficient, and SURF4-rescued HEK 293T cells was assessed by one-way  
13 ANOVA.

14

### 15 **Acknowledgments**

16 This work was supported by National Institute of Health Grants Ko8 HL128794 (R.Kh.)  
17 and Ro1 HL148333 (R.Kh.). This work was also supported by MCubed, a research seed-  
18 funding program for faculty at the University of Michigan (R.Kh., K.D.), and by the  
19 University of Michigan Rogel Cancer Center (R.Kh.). R.Ki. was supported by NIH T32-  
20 CA009357. G.B.C. was supported by NIH T32-GM007315.

21

### 22 **Author Contributions**



1 Z.L. and R.Kh. conceived the study and designed the experiments. Z.L. performed the  
2 majority of the experiments. R.Ki., V.T., G.M., G.B.C., A.F., B.M., and B.E. performed  
3 additional experiments. Z.L., R.Ki., and R.Kh. analyzed most of the experimental data.  
4 K.D., P.R., and B.E. helped with analyzing the results. V.T., A.B.O., and D.S. analyzed  
5 the sequencing data. Z.L. and R.Kh. wrote the manuscript with help from all authors. All  
6 the authors contributed to the integration and discussion of the results.

7

### 8 **Declaration of Interests**

9 The authors declare no competing interests.

## 1 **References:**

- 2
- 3 1. I. Braakman, N. J. Balleid, Protein Folding and Modification in the Mammalian
- 4 Endoplasmic Reticulum. *Annual Review of Biochemistry* **80**, 71-99 (2011).
- 5 2. L. F. Mathias Uhlen, Bjorn M. Hallstrom, Cecilia Lindskog, Per Oksvold, Adil Mardinoglu,
- 6 Åsa Sivertsson, Caroline Kampf, Evelina Sjöstedt, Anna Asplund, IngMarie Olsson,
- 7 Karolina Edlund, Emma Lundberg, Sanjay Navani,, J. O. Cristina Al-Khalili Szigyarto,
- 8 Dijana Djureinovic,, S. H. Jenny Ottosson Takanen, Tove Alm, Per-Henrik Edqvist, Holger
- 9 Berling, Hanna Tegel, Jan Mulder, Johan Rockberg, Peter Nilsson, Jochen M. Schwenk,,
- 10 K. v. F. Marica Hamsten, Mattias Forsberg, Lukas Persson,, M. Z. Fredric Johansson,
- 11 Gunnar von Heijne, Jens Nielsen, Fredrik Pontén, Tissue-based map of the human
- 12 proteome. *Science* **347** (2015).
- 13 3. D. Jensen, R. Schekman, COPII-mediated vesicle formation at a glance. *J Cell Sci* **124**, 1-4
- 14 (2011).
- 15 4. C. Barlowe, A. Helenius, Cargo Capture and Bulk Flow in the Early Secretory Pathway.
- 16 *Annu Rev Cell Dev Biol* **32**, 197-222 (2016).
- 17 5. Moise Bendayan, Jurgen Roth, Alain Perrelet, L. Orci, Quantitative immunocytochemical
- 18 localization of pancreatic secretory proteins in subcellular compartments of the rat
- 19 acinar cell. *The Journal of Histochemistry and Cytochemistry* **28**, 149-160 (1980).
- 20 6. M. J. Kuehn, J. M. Herrmann, R. Schekman, COPII-cargo interactions direct protein
- 21 sorting into ER-derived transport vesicles. *Nature* **391**, 187-190 (1998).
- 22 7. T. Y. Nina R. Salama, Randy W. Schekman, The Sec13p complex and reconstitution of
- 23 vesicle budding from the ER with purified cytosolic proteins. *The EMBO Journal* **12**,
- 24 4073-4082 (1993).
- 25 8. W. E. Balch, J. M. McCaffery, H. Plutner, M. G. Farquhar, Vesicular stomatitis virus
- 26 glycoprotein is sorted and concentrated during export from the endoplasmic reticulum.
- 27 *Cell* **76**, 841-852 (1994).
- 28 9. Charles Barlowe *et al.*, COPII: a membrane coat formed by Sec proteins that drive vesicle
- 29 budding from the endoplasmic reticulum. *Cell* **77**, 895-907 (1994).
- 30 10. F. Kappeler, D. R. C. Klopfenstein, M. Foguet, J.-P. Paccaud, H.-P. Hauri, The recycling of
- 31 ERGIC-53 in the Early Secretory Pathway. *The Journal of Biological Chemistry* **272**,
- 32 31801-31808 (1997).
- 33 11. C. Itin, A.-C. Roche, M. Monsigny, H.-P. Hauri, ERGIC-53 Is a Functional Mannose-
- 34 selective and Calcium-dependent Human Homologue of Leguminous Lectins. *Molecular*
- 35 *Biology of the Cell* **7**, 483-493 (1996).
- 36 12. William C. Nichols *et al.*, Mutations in the ER-Golgi intermediate compartment protein
- 37 ERGIC-53 cause combined deficiency of coagulation factors V and VIII. *Cell* **93** (1998).
- 38 13. B. Zhang, Recent developments in the understanding of the combined deficiency of FV
- 39 and FVIII. *Br J Haematol* **145**, 15-23 (2009).
- 40 14. B. Zhang *et al.*, Mice deficient in LMAN1 exhibit FV and FVIII deficiencies and liver
- 41 accumulation of alpha1-antitrypsin. *Blood* **118**, 3384-3391 (2011).
- 42 15. Christian Appenzeller, Helena Andersson, Felix Kappeler, a. H.-P. Hauri, The lectin ERGIC-
- 43 53 is a cargo transport receptor for glycoproteins. *Nature Cell Biology* **1** (1999).

- 1 16. B. Nyfeler *et al.*, Identification of ERGIC-53 as an intracellular transport receptor of  
2 alpha1-antitrypsin. *J Cell Biol* **180**, 705-712 (2008).
- 3 17. N. Gomez-Navarro, E. Miller, Protein sorting at the ER–Golgi interface. *The Journal of*  
4 *Cell Biology* **215**, 769-778 (2016).
- 5 18. Sebastian Bachmann, Michel Le Hir, a. K.-U. Eckardt, Co-localization of Erythropoietin  
6 mRNA and Ecto-5'-Nucleotidase Immunoreactivity in Peritubular Cells of Rat Renal  
7 Cortex Indicates That Fibroblasts Produce Erythropoietin. *The Journal of Histochemistry*  
8 *and Cytochemistry* **41**, 335-341 (1993).
- 9 19. P. H. Maxwell *et al.*, Sites of erythropoietin production. *Kidney Int* **51**, 393-401 (1997).
- 10 20. H. Kobayashi *et al.*, Distinct subpopulations of FOXD1 stroma-derived cells regulate renal  
11 erythropoietin. *J Clin Invest* **126**, 1926-1938 (2016).
- 12 21. X. Pan *et al.*, Isolation and characterization of renal erythropoietin-producing cells from  
13 genetically produced anemia mice. *PLoS One* **6**, e25839 (2011).
- 14 22. C. J. Gregory, Erythropoietin Sensitivity as a Differentiation Marker in the Hemopoietic  
15 System: Studies of Three Erythropoietic Colony Responses in Culture. *Journal of Cellular*  
16 *Physiology* **89** (1976).
- 17 23. N. Suzuki *et al.*, Erythroid-specific expression of the erythropoietin receptor rescued its  
18 null mutant mice from lethality. *Blood* **100**, 2279-2288 (2002).
- 19 24. Hong Wu, Xin Liu, Rudolf Jaenisch, H. F. Lodish, Generation of committed erythroid BFU-  
20 E and CFU-E progenitors does not require erythropoietin or the erythropoietin receptor.  
21 *Cell* **83** (1995).
- 22 25. W. Y. Kim *et al.*, Failure to prolyl hydroxylate hypoxia-inducible factor alpha phenocopies  
23 VHL inactivation in vivo. *The EMBO Journal* **25** (2006).
- 24 26. J. Kochling, P. T. Curtin, A. Madan, Regulation of human erythropoietin gene induction  
25 by upstream flanking sequences in transgenic mice. *British Journal of Haematology* **103**  
26 (1998).
- 27 27. C. W. Pugh, C. C. Tan, R. W. Jones, P. J. Ratcliffe, Functional analysis of an oxygen-  
28 regulated transcriptional enhancer lying 3' to the mouse erythropoietin gene. *Proc Natl*  
29 *Acad Sci U S A* **88**, 10553-10557 (1991).
- 30 28. Guang L. Wang, Bing-Hua Jiang, Elizabeth A. Rue, a. G. L. Semenza, Hypoxia-inducible  
31 factor 1 is a basic-helix-loop-helix-PAS heterodimer regulated by cellular O<sub>2</sub> tension.  
32 *Proceedings of the National Academy of Sciences of the United States of America* **92**,  
33 5510-5514 (1995).
- 34 29. Norio Suzuki, 2 Naoshi Obara, 2 Xiaoqing Pan, 1, 2 Miho Watanabe, 3 Kou-Ichi Jishage, 3  
35 Naoko Minegishi, 1 and Masayuki Yamamoto, 1, 2\*, Specific Contribution of the  
36 Erythropoietin Gene 3' Enhancer to Hepatic Erythropoiesis after Late Embryonic Stages.  
37 *Molecular and Cellular Biology* **31** (2011).
- 38 30. W. Jelkmann, Regulation of erythropoietin production. *J Physiol* **589**, 1251-1258 (2011).
- 39 31. W. J. Belden, a. C. Barlowe, Role of Erv29p in Collecting Soluble Secretory Proteins into  
40 ER-Derived Transport Vesicles. *Science* **294**, 1528-1531 (2001).
- 41 32. B. T. Emmer *et al.*, The cargo receptor SURF4 promotes the efficient cellular secretion of  
42 PCSK9. *Elife* **7** (2018).

- 1 33. K. Saegusa, M. Sato, N. Morooka, T. Hara, K. Sato, SFT-4/Surf4 control ER export of  
2 soluble cargo proteins and participate in ER exit site organization. *The Journal of Cell*  
3 *Biology* **217**, 2073-2085 (2018).
- 4 34. S. Mitrovic, H. Ben-Tekaya, E. Kogler, J. Gruenberg, H. P. Hauri, The cargo receptors  
5 Surf4, endoplasmic reticulum-Golgi intermediate compartment (ERGIC)-53, and p25 are  
6 required to maintain the architecture of ERGIC and Golgi. *Mol Biol Cell* **19**, 1976-1990  
7 (2008).
- 8 35. K. Saegusa, M. Sato, N. Morooka, T. Hara, K. Sato, SFT-4/Surf4 control ER export of  
9 soluble cargo proteins and participate in ER exit site organization. *J Cell Biol* **217**, 2073-  
10 2085 (2018).
- 11 36. P. Malkus, F. Jiang, R. Schekman, Concentrative sorting of secretory cargo proteins into  
12 COPII-coated vesicles. *J Cell Biol* **159**, 915-921 (2002).
- 13 37. S. Otte, C. Barlowe, Sorting signals can direct receptor-mediated export of soluble  
14 proteins into COPII vesicles. *Nat Cell Biol* **6**, 1189-1194 (2004).
- 15 38. D. A. Foley, H. J. Sharpe, S. Otte, Membrane topology of the endoplasmic reticulum to  
16 Golgi transport factor Erv29p. *Mol Membr Biol* **24**, 259-268 (2007).
- 17 39. Y. Yin *et al.*, Surf4 (Erv29p) binds amino-terminal tripeptide motifs of soluble cargo  
18 proteins with different affinities, enabling prioritization of their exit from the  
19 endoplasmic reticulum. *PLoS Biol* **16**, e2005140 (2018).
- 20 40. B. T. Emmer *et al.*, Murine Surf4 is essential for early embryonic development. *BioRxiv*  
21 10.1101/541995 (2019).
- 22 41. N. E. Sanjana, O. Shalem, F. Zhang, Improved vectors and genome-wide libraries for  
23 CRISPR screening. *Nat Methods* **11**, 783-784 (2014).
- 24 42. J. Joung *et al.*, Genome-scale CRISPR-Cas9 knockout and transcriptional activation  
25 screening. *Nat Protoc* **12**, 828-863 (2017).
- 26 43. R. J. Ihry *et al.*, Genome-Scale CRISPR Screens Identify Human Pluripotency-Specific  
27 Genes. *Cell Rep* **27**, 616-630 e616 (2019).
- 28 44. M. C. Canver *et al.*, BCL11A enhancer dissection by Cas9-mediated in situ saturating  
29 mutagenesis. *Nature* **527**, 192-197 (2015).
- 30 45. T. Yamauchi *et al.*, Genome-wide CRISPR-Cas9 Screen Identifies Leukemia-Specific  
31 Dependence on a Pre-mRNA Metabolic Pathway Regulated by DCPS. *Cancer Cell* **33**,  
32 386-400 e385 (2018).
- 33 46. X. L. Jeremy D. Grevet, Nicole Hamagami, Christopher R. Edwards, Laavanya  
34 Sankaranarayanan, Xinjun Ji, Saurabh K. Bhardwaj, Carolyne J. Face, David F. Posocco,  
35 Osheiza Abdulmalik, Cheryl A. Keller, Belinda Giardine, Simone Sidoli, Ben A. Garcia,  
36 Stella T. Chou, Stephen A. Liebhaber, Ross C. Hardison, Junwei Shi, Gerd A. Blobel,  
37 Domain-focused CRISPR screen identifies HRI as a fetal hemoglobin regulator in human  
38 erythroid cells. *Science* **361**, 285-290 (2018).
- 39 47. X. Liu *et al.*, In Situ Capture of Chromatin Interactions by Biotinylated dCas9. *Cell* **170**,  
40 1028-1043 e1019 (2017).
- 41 48. T. Wang, J. J. Wei, D. M. Sabatini, E. S. Lander, Genetic screens in human cells using the  
42 CRISPR-Cas9 system. *Science* **343**, 80-84 (2014).

- 1 49. Y. L. Hiroko Koike-Yusa, E-Pien Tan, Martin Del Castillo Velasco-Herrera, Kosuke Yusa,  
2 Genome-wide recessive genetic screening in mammalian cells with a lentiviral CRISPR-  
3 guide RNA library. *Nature biotechnology* **32** (2014).
- 4 50. T. Wang *et al.*, Gene Essentiality Profiling Reveals Gene Networks and Synthetic Lethal  
5 Interactions with Oncogenic Ras. *Cell* **168**, 890-903 e815 (2017).
- 6 51. T. Hart *et al.*, High-Resolution CRISPR Screens Reveal Fitness Genes and Genotype-  
7 Specific Cancer Liabilities. *Cell* **163**, 1515-1526 (2015).
- 8 52. R. Zhang *et al.*, A CRISPR screen defines a signal peptide processing pathway required by  
9 flaviviruses. *Nature* **535**, 164-168 (2016).
- 10 53. E. Wang *et al.*, Targeting an RNA-Binding Protein Network in Acute Myeloid Leukemia.  
11 *Cancer Cell* **35**, 369-384 e367 (2019).
- 12 54. M. W. LaFleur *et al.*, A CRISPR-Cas9 delivery system for in vivo screening of genes in the  
13 immune system. *Nat Commun* **10**, 1668 (2019).
- 14 55. K. R. Sanson *et al.*, Optimized libraries for CRISPR-Cas9 genetic screens with multiple  
15 modalities. *Nat Commun* **9**, 5416 (2018).
- 16 56. J.D. Firth, B.L. Ebert, C.W. Pugh, a. P. J. Ratcliffe, Oxygen-regulated control elements in  
17 the phosphoglycerate kinase 1 and lactate dehydrogenase A genes: similarities with the  
18 erythropoietin 3' enhancer. *Proc Natl Acad Sci U S A* **91**, 6496-6500 (1994).
- 19 57. N. Obara *et al.*, Repression via the GATA box is essential for tissue-specific  
20 erythropoietin gene expression. *Blood* **111**, 5223-5232 (2008).
- 21 58. K. Franke, M. Gassmann, B. Wielockx, Erythrocytosis: the HIF pathway in control. *Blood*  
22 **122**, 1122-1128 (2013).
- 23 59. P. P. Kapitsinou *et al.*, Hepatic HIF-2 regulates erythropoietic responses to hypoxia in  
24 renal anemia. *Blood* **116**, 3039-3048 (2010).
- 25 60. J. Zmajkovic *et al.*, A Gain-of-Function Mutation in EPO in Familial Erythrocytosis. *N Engl*  
26 *J Med* **378**, 924-930 (2018).
- 27 61. S. O. Ang *et al.*, Disruption of oxygen homeostasis underlies congenital Chuvash  
28 polycythemia. *Nat Genet* **32**, 614-621 (2002).
- 29 62. Patricia Costa-Giomi, Jaime Caro, R. Weinmann, Enhancement by hypoxia of human  
30 erythropoietin gene transcription in vitro. *The Journal of Biological Chemistry* **265**,  
31 10185-10188 (1990).
- 32 63. Gregg L. Semenza, Mary K. Nejfelt, S. M. Chi, S. E. Antonarakis, Hypoxia-inducible  
33 nuclear factors bind to an enhancer element located 3' to the human erythropoietin  
34 gene. *Proc Natl Acad Sci U S A* **88**, 5680-5684 (1991).
- 35 64. Gregg L. Semenza, Stephen T. Koury, Mary K. Nejfelt, John D. Gearhart, S. E.  
36 Antonarakis, Cell-type-specific and hypoxia-inducible expression of the human  
37 erythropoietin gene in transgenic mice. *Proc Natl Acad Sci U S A* **88**, 8725-8729 (1991).
- 38 65. G. L. Semenza, Involvement of oxygen-sensing pathways in physiologic and pathologic  
39 erythropoiesis. *Blood* **114**, 2015-2019 (2009).
- 40 66. C. Ladroue *et al.*, Distinct deregulation of the hypoxia inducible factor by PHD2 mutants  
41 identified in germline DNA of patients with polycythemia. *Haematologica* **97**, 9-14  
42 (2012).
- 43 67. M. J. Percy *et al.*, Two new mutations in the HIF2A gene associated with erythrocytosis.  
44 *Am J Hematol* **87**, 439-442 (2012).

- 1 68. Z. Zhuang *et al.*, Somatic HIF2A gain-of-function mutations in paraganglioma with  
2 polycythemia. *N Engl J Med* **367**, 922-930 (2012).
- 3 69. M. Gruber *et al.*, Acute postnatal ablation of Hif-2alpha results in anemia. *Proc Natl*  
4 *Acad Sci U S A* **104**, 2301-2306 (2007).
- 5 70. E. B. Rankin *et al.*, Inactivation of the arylhydrocarbon receptor nuclear translocator  
6 (Arnt) suppresses von Hippel-Lindau disease-associated vascular tumors in mice. *Mol*  
7 *Cell Biol* **25**, 3163-3172 (2005).
- 8 71. Yoji Andrew Minamishima *et al.*, Somatic inactivation of the PHD2 prolyl hydroxylase  
9 causes polycythemia and congestive heart failure. *Blood* **111** (2008).
- 10 72. William Querbes *et al.*, Treatment of erythropoietin deficiency in mice with systemically  
11 administered siRNA. *Blood* 0.1182/blood-2012-04-423715 (2012).
- 12 73. W. M. Bernhardt *et al.*, Inhibition of prolyl hydroxylases increases erythropoietin  
13 production in ESRD. *J Am Soc Nephrol* **21**, 2151-2156 (2010).
- 14 74. V. G. Sankaran, M. J. Weiss, Anemia: progress in molecular mechanisms and therapies.  
15 *Nat Med* **21**, 221-230 (2015).
- 16 75. A. A. Joharapurkar, V. B. Pandya, V. J. Patel, R. C. Desai, M. R. Jain, Prolyl Hydroxylase  
17 Inhibitors: A Breakthrough in the Therapy of Anemia Associated with Chronic Diseases. *J*  
18 *Med Chem* **61**, 6964-6982 (2018).
- 19 76. P. H. Maxwell, K. U. Eckardt, HIF prolyl hydroxylase inhibitors for the treatment of renal  
20 anaemia and beyond. *Nat Rev Nephrol* **12**, 157-168 (2016).
- 21 77. J. Kaplan, Roxadustat and Anemia of Chronic Kidney Disease. *the New England Journal of*  
22 *Medicine* (2019).
- 23 78. N. Gupta, J. B. Wish, Hypoxia-Inducible Factor Prolyl Hydroxylase Inhibitors: A Potential  
24 New Treatment for Anemia in Patients With CKD. *Am J Kidney Dis* **69**, 815-826 (2017).
- 25 79. A. Yamamoto *et al.*, Systemic silencing of PHD2 causes reversible immune regulatory  
26 dysfunction. *J Clin Invest* **130** (2019).
- 27 80. G. L. Semenza, Targeting HIF-1 for cancer therapy. *Nat Rev Cancer* **3**, 721-732 (2003).
- 28 81. G. N. Masoud, W. Li, HIF-1alpha pathway: role, regulation and intervention for cancer  
29 therapy. *Acta Pharm Sin B* **5**, 378-389 (2015).
- 30 82. A. R. Kim *et al.*, Functional Selectivity in Cytokine Signaling Revealed Through a  
31 Pathogenic EPO Mutation. *Cell* **168**, 1053-1064 e1015 (2017).
- 32 83. Lily Jun-shen Huang, Stefan N. Constantinescu, a. H. F. Lodish, The N-Terminal Domain  
33 of Janus Kinase 2Is Required for Golgi Processing and Cell Surface Expression of  
34 Erythropoietin Receptor. *Molecular Cell* **8**, 1327-1338 (2001).
- 35 84. A. Halupa *et al.*, A novel role for STAT1 in regulating murine erythropoiesis: deletion of  
36 STAT1 results in overall reduction of erythroid progenitors and alters their distribution.  
37 *Blood* **105**, 552-561 (2005).
- 38 85. Victor R. Gordeuk, David W. Stockton, J. T. Prchal, Congenital  
39 Polycythemia/Erythrocytoses. *Haematologica* (2005).
- 40 86. M. M. Patnaik, A. Tefferi, The complete evaluation of erythrocytosis: congenital and  
41 acquired. *Leukemia* **23**, 834-844 (2009).
- 42 87. T Ng, G Marx, T Littlewood, I. Macdougall, Recombinant erythropoietin in clinical  
43 practice. *BMJ Journals* **79**, 367-376 (2003).



- 1 88. J. Douglas Rizzo *et al.*, Erythropoietin: A Paradigm for the Development of Practice  
2 Guidelines. *ASH Education book* (2001).
- 3 89. J. D. Rizzo *et al.*, Use of epoetin in patients with cancer: evidence-based clinical practice  
4 guidelines of the American Society of Clinical Oncology and the American Society of  
5 Hematology. *Blood* **100**, 2303-2320 (2002).
- 6 90. M. Jadersten, S. M. Montgomery, I. Dybedal, A. Porwit-MacDonald, E. Hellstrom-  
7 Lindberg, Long-term outcome of treatment of anemia in MDS with erythropoietin and  
8 G-CSF. *Blood* **106**, 803-811 (2005).
- 9 91. Anonymous, Erythropoietin (EPO) Drugs Market Analysis By Drug Class (Biologics,  
10 Biosimilars), By Product (Epoetin-alfa, Epoetin-beta, Darbepoetin-alfa, Others), By  
11 Application, And Segment Forecasts, 2018 - 2025.  
12 [https://www.grandviewresearch.com/industry-analysis/erythropoietin-epo-drugs-](https://www.grandviewresearch.com/industry-analysis/erythropoietin-epo-drugs-market)  
13 [market](https://www.grandviewresearch.com/industry-analysis/erythropoietin-epo-drugs-market). (2017).
- 14 92. S. A. Stewart *et al.*, Lentivirus-delivered stable gene silencing by RNAi in primary cells.  
15 *RNA* **9**, 493-501 (2003).
- 16 93. Wei Li *et al.*, MAGeCK enables robust identification of essential genes from genome-  
17 scale CRISPR:Cas9 knockout screens. *Genome Biology* **15** (2014).
- 18 94. M. I. Love, W. Huber, S. Anders, Moderated estimation of fold change and dispersion for  
19 RNA-seq data with DESeq2. *Genome Biol* **15**, 550 (2014).
- 20 95. F. A. Ran *et al.*, Genome engineering using the CRISPR-Cas9 system. *Nat Protoc* **8**, 2281-  
21 2308 (2013).
- 22 96. R. Khoriaty *et al.*, Pancreatic SEC23B deficiency is sufficient to explain the perinatal  
23 lethality of germline SEC23B deficiency in mice. *Sci Rep* **6**, 27802 (2016).
- 24 97. R. Khoriaty *et al.*, Absence of a red blood cell phenotype in mice with hematopoietic  
25 deficiency of SEC23B. *Mol Cell Biol* **34**, 3721-3734 (2014).
- 26 98. R. Khoriaty *et al.*, Functions of the COPII gene paralogs SEC23A and SEC23B are  
27 interchangeable in vivo. *Proc Natl Acad Sci U S A* **115**, E7748-E7757 (2018).
- 28 99. L. M. Costantini *et al.*, A palette of fluorescent proteins optimized for diverse cellular  
29 environments. *Nat Commun* **6**, 7670 (2015).
- 30 100. K. E. Luker *et al.*, Comparative study reveals better far-red fluorescent protein for whole  
31 body imaging. *Sci Rep* **5**, 10332 (2015).

32  
33

## 1 **Figure Legends**

2  
3 **Fig. 1. A reporter HEK293T cell line stably expressing EPO-eGFP and A1AT-mCherry.** (A) A construct that expresses EPO-eGFP and A1AT-mCherry from the same  
4 CMV promoter was assembled and used to generate the reporter cell line. A P2A  
5 sequence separates EPO-eGFP from A1AT-mCherry. (B) Intracellular and extracellular  
6 EPO-eGFP and A1AT-mCherry protein abundance was determined by Western blot  
7 using anti-eGFP and anti-mCherry antibodies, respectively. E: ER form of EPO; F: fully-  
8 glycosylated EPO. (C) Protein abundance was quantified using Image J with GAPDH as  
9 control. (D) Inhibiting ER to Golgi transport with Brefeldin A (BFA) leads to  
10 intracellular accumulation of EPO-eGFP and A1AT-mCherry, as measured by  
11 fluorescence intensity (E) *LMAN1* deletion results in intracellular accumulation of A1AT  
12 with no effect on EPO.  
13

14  
15 **Fig. 2. CRISPR/Cas9 loss-of-function screen to identify genes that affect**  
16 **intracellular EPO levels.** (A) Screen strategy: 24 hours following transduction of the  
17 CRISPR library, puromycin selection was applied for 3 days. At day 14, cells with  
18 unchanged mCherry but with top or bottom 7% eGFP fluorescence were isolated.  
19 sgRNAs abundance was then determined in each cell population. (B) Gene level  
20 enrichment score was calculated for every gene using MAGeCK (see methods). Each  
21 gene is represented by a bubble, the size of which is proportional to number of sgRNAs  
22 with significant enrichment in the eGFP high population. *SURF4* has the highest  
23 MAGeCK enrichment score and is the only gene for which the false discovery rate (FDR)  
24 is <10%. NT: non-targeting. (C) Normalized abundance of *SURF4*-targeting sgRNAs in  
25 the eGFP high and eGFP low populations. Abundance score calculated from 3 biological  
26 replicates, using DEseq (see methods). *SURF4* sgRNAs are highlighted in orange. (D)  
27 Normalized counts for the 6 *SURF4* targeting sgRNAs included in the library, for all 3  
28 biological replicates. p-values were calculated using MAGeCK.  
29

30 **Fig. 3. *SURF4* deletion results in intracellular accumulation of EPO-eGFP.**  
31 (A) *SURF4*-targeting sgRNA1 and sgRNA2 are highly efficient, causing indels in ~97%  
32 and 77% of alleles, respectively. (B, C) Flow cytometry histograms showing intracellular  
33 accumulation of EPO, but not A1AT, following *SURF4* deletion in HEK293T cells, using  
34 2 independent sgRNAs, (B) sgRNA1 or (C) sgRNA2. (D) Quantification of intracellular  
35 mean fluorescence intensity in 3 independent clonal reporter cell lines transduced with  
36 *SURF4*-sgRNA1 (n=12). Results were normalized to mean fluorescence intensity of cells  
37 transduced with non-targeting sgRNAs. (E, F) Flow cytometry histograms and  
38 normalized mean fluorescence intensity of EPO-eGFP in several clonal cell lines with  
39 sequence-confirmed *SURF4* frameshift mutations (*SURF4* deleted) with or without  
40 stable expression of wildtype *SURF4* cDNA. Mean fluorescence intensity in panel F was  
41 normalized to that of wildtype cells. \*\*\*\* p<0.0001.  
42

43 **Fig. 4. *SURF4* mutagenesis causes reduced Extracellular EPO-FLAG**  
44 **secretion.** (A) We generated a FLP-In TREX HEK293 cell line with tetracycline  
45 inducible EPO-FLAG expression. (B) Intracellular and extracellular EPO-FLAG  
46 abundance in wild-type, *SURF4*-deficient, and *SURF4*-rescued cells was measured by  
47 Western blot (using anti-FLAG antibody) after 0, 12, and 24 hours of incubation with



1 tetracycline.  $\alpha$ -tubulin was used as loading control. (C) Quantification of densitometry  
2 of extracellular EPO and (D) ratios of extracellular/intracellular EPO normalized to  $\alpha$ -  
3 tubulin in 3 independent experiments. \*  $p < 0.05$ , \*\*  $p < 0.01$  by two-way ANOVA. Error  
4 bars represent standard deviations.

5  
6 **Fig. 5. Disruption of *SURF4* results in accumulation of EPO in the ER.** (A)  
7 Live cell fluorescent confocal microscopy of wildtype or *SURF4* deleted reporter cells  
8 expressing the ER marker, ERoxBFP. (B) Quantification of the degree of co-localization  
9 between EPO and ERoxBFP, as well as A1AT and ERoxBFP as control, by Pearson  
10 correlation coefficient.  $n=6$  for wildtype,  $n=12$  for *SURF4* deficient cells. \*\*\*\*  $p$ -value  
11  $< 0.0001$ , unpaired student t-test, ns = non-significant. (C) Cell lysates were collected  
12 from wildtype, *SURF4* deleted, or *SURF4* rescued cells (*SURF4* deleted cells with stable  
13 expression of wildtype *SURF4* cDNA) expressing EPO-eGFP and were either treated  
14 with EndoH or left untreated. Immunoblotting was done with anti-GFP antibody. E =  
15 ER form of EPO (endoH sensitive), U = unglycosylated EPO, F = fully glycosylated EPO  
16 (post-Golgi form of EPO) as demonstrated by treating wildtype cells with either PNGase  
17 or EndoH (see Fig. S2). (D) Quantification of EndoH sensitivity from 3 independent  
18 experiments. \*  $p < 0.05$ . (E) FLAG antibody or eGFP antibody were used to  
19 immunoprecipitate EPO-eGFP or *SURF4*-FLAG, respectively, from lysates of cells  
20 expressing either EPO-eGFP, *SURF4*-FLAG, both, or neither.

21  
22 **Fig. 6. Thrombopoietin secretion does not depend on *SURF4*.** (A) A construct  
23 that expresses TPO-eGFP and A1AT-mCherry from the same CMV promoter was  
24 assembled and used to generate a reporter cell line stably expressing these two fusion  
25 proteins. (B) Intracellular and extracellular TPO-eGFP and A1AT-mCherry protein  
26 abundance was determined by Western blot using anti-eGFP and anti-mCherry  
27 antibodies, respectively. (C) Flow cytometry histograms showing absence of intracellular  
28 accumulation of TPO following *SURF4* deletion in HEK293T cells. (D) Quantification of  
29 cellular mean fluorescence intensity of TPO-eGFP and A1AT-mCherry in cells  
30 transduced with *SURF4*-targeting sgRNAs ( $n=29$ ). Results were normalized to mean  
31 fluorescence intensity of cells transduced with non-targeting sgRNAs. As a positive  
32 control, the same experiment was performed in parallel in reporter cell lines expressing  
33 EPO-eGFP and A1AT-mCherry ( $n=48$ ). \*\*\*\*  $p < 0.0001$ , ns=non-significant.

34  
35 **Fig. 7. *SURF4* deletion in HEP3B cells results in reduced extracellular**  
36 **secretion of EPO expressed from its endogenous genomic locus.** HEP3B cells  
37 were transduced with lentivirus expressing *SURF4*-targeting sgRNAs, control sgRNAs,  
38 or EPO-targeting sgRNA as a positive control. EPO expression from its endogenous  
39 regulatory elements was subsequently induced with  $\text{CoCl}_2$  and measured in the  
40 conditioned media by ELISA and normalized to the total number of cells. \*\*  $p < 0.01$ ,  
41 \*\*\*\*  $p < 0.0001$ .

42  
43 **Fig. 8. *SURF4* overexpression leads to enhanced EPO secretion.** (A) A  
44 lentiviral construct that expresses equal amounts of *SURF4* and *Katushka2S* from the  
45 same PGK promoter was assembled and transduced into HEK293 cells expressing EPO-  
46 FLAG from a tetracycline inducible promoter. Cells with top 10% and bottom 10%  
47 *Katushka2S* fluorescence were FACS sorted, corresponding to cells overexpressing

1 SURF4 and control cells, respectively. (B) Intracellular and extracellular EPO  
2 abundance following a 12-hour tetracycline incubation was analyzed by Western blot  
3 (using anti-FLAG antibody) and (C) quantification of densitometry of the ratio of  
4 extracellular/intracellular EPO was determined in 3 independent experiments. (D) The  
5 extracellular EPO level was also measured by ELISA. (E) HEP3B cells overexpressing  
6 SURF4 (and control cells) were generated as described above. Following incubation with  
7 CoCl<sub>2</sub>, the extracellular EPO level was measured by ELISA. \*\*\*P<0.001, unpaired t-test.

Fig. 1

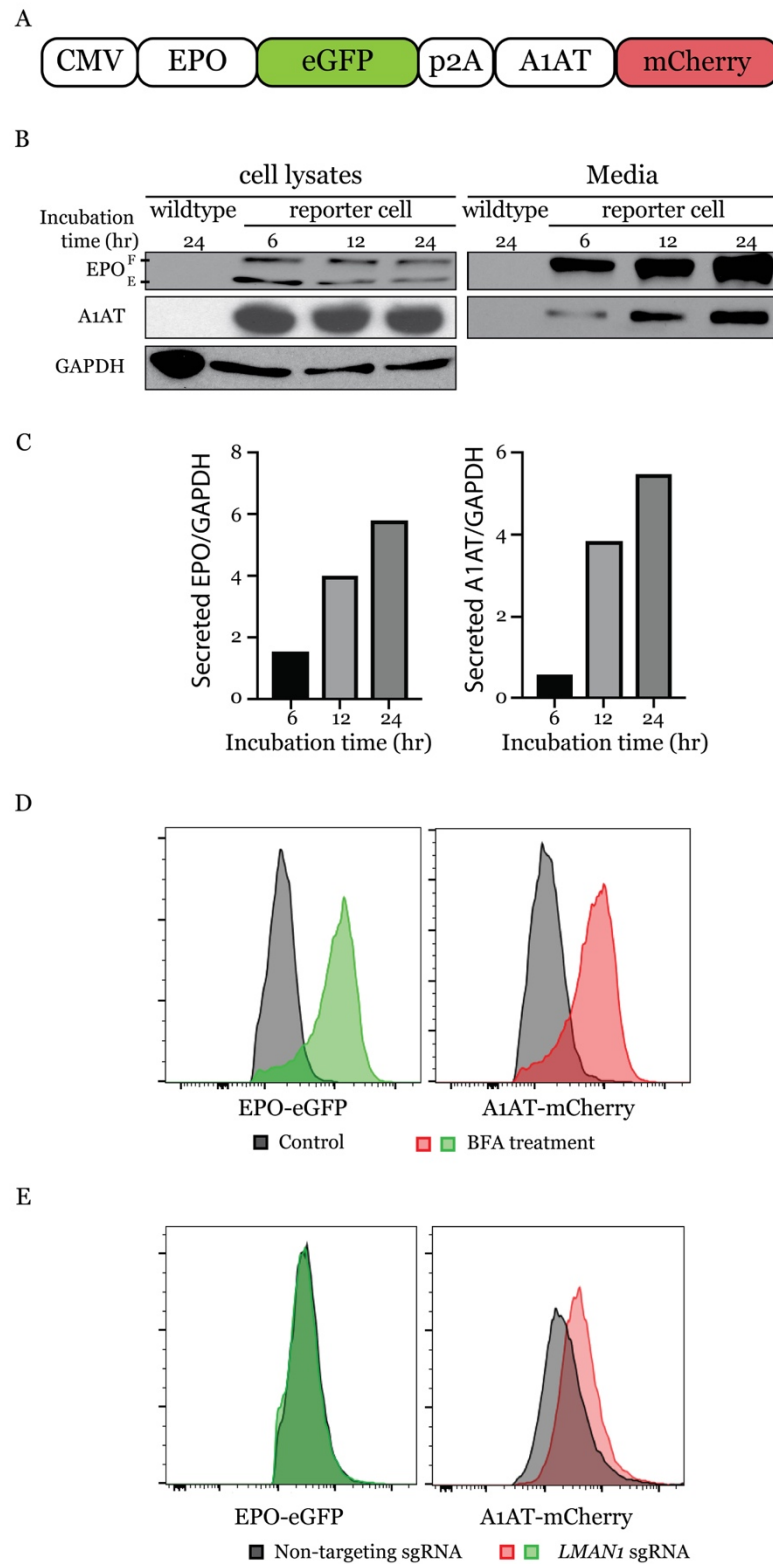

Fig. 2

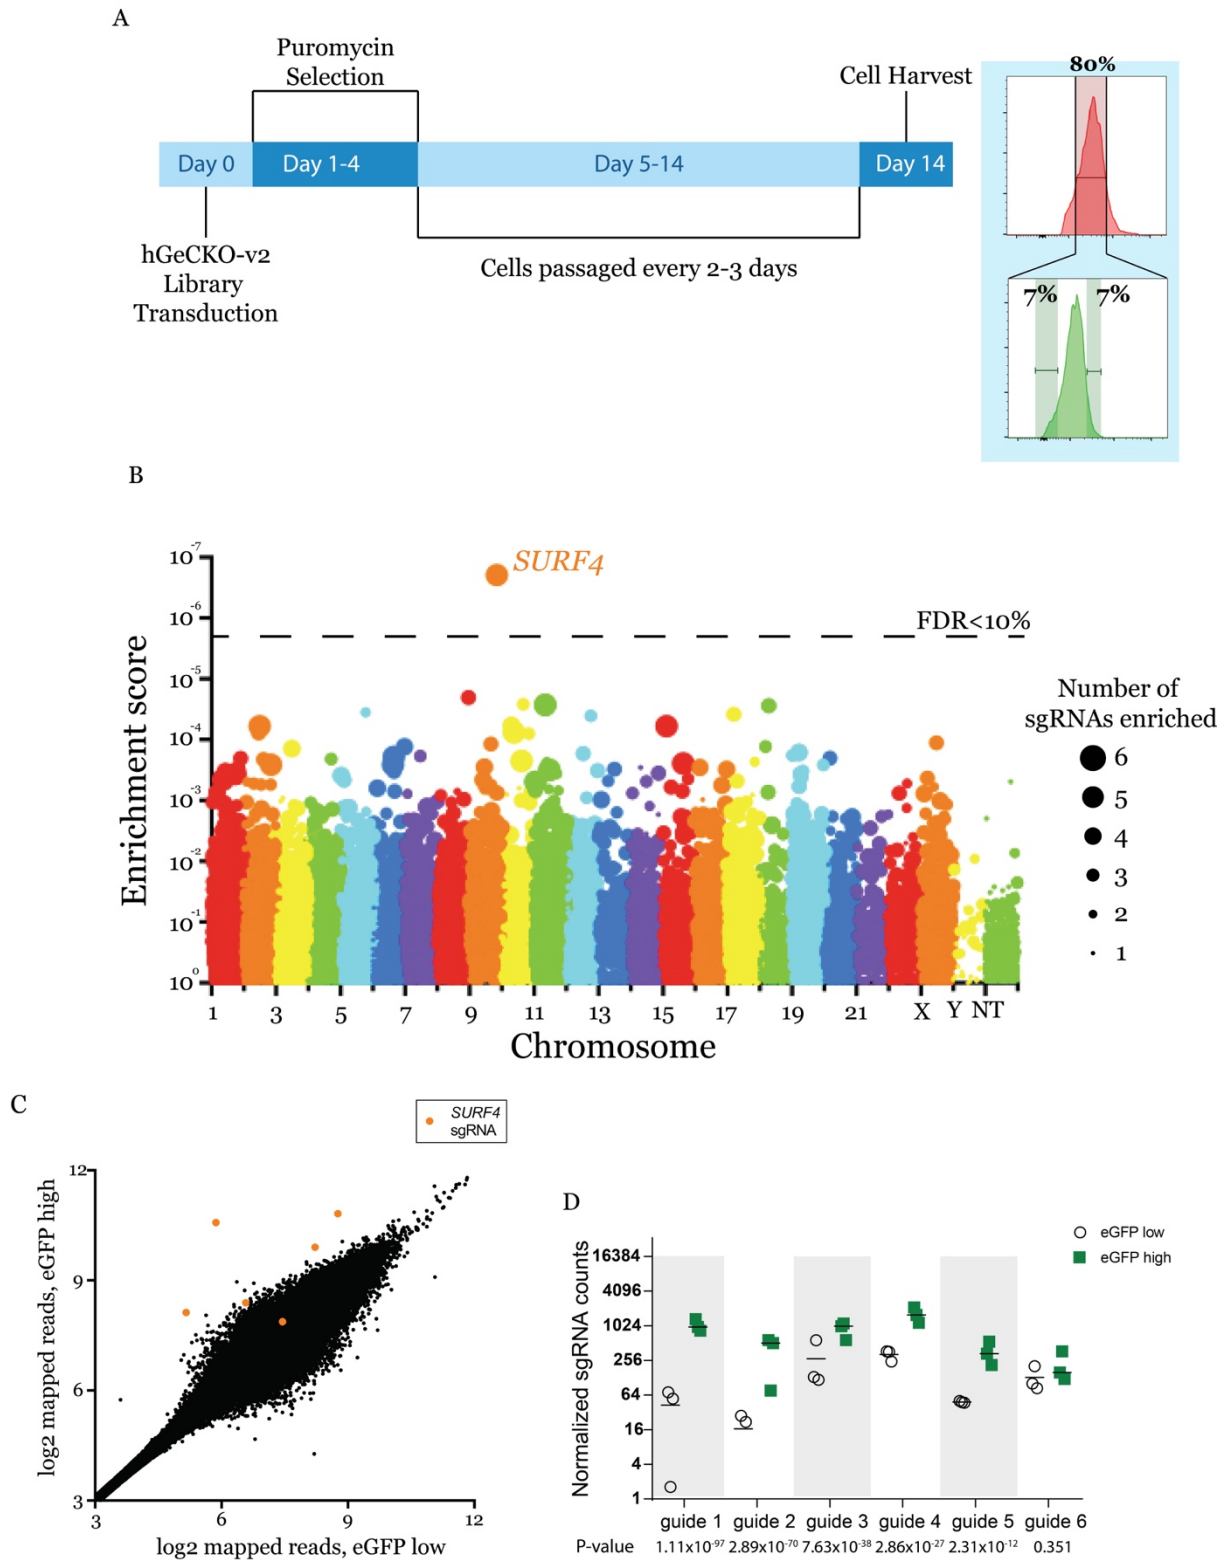

Fig. 3

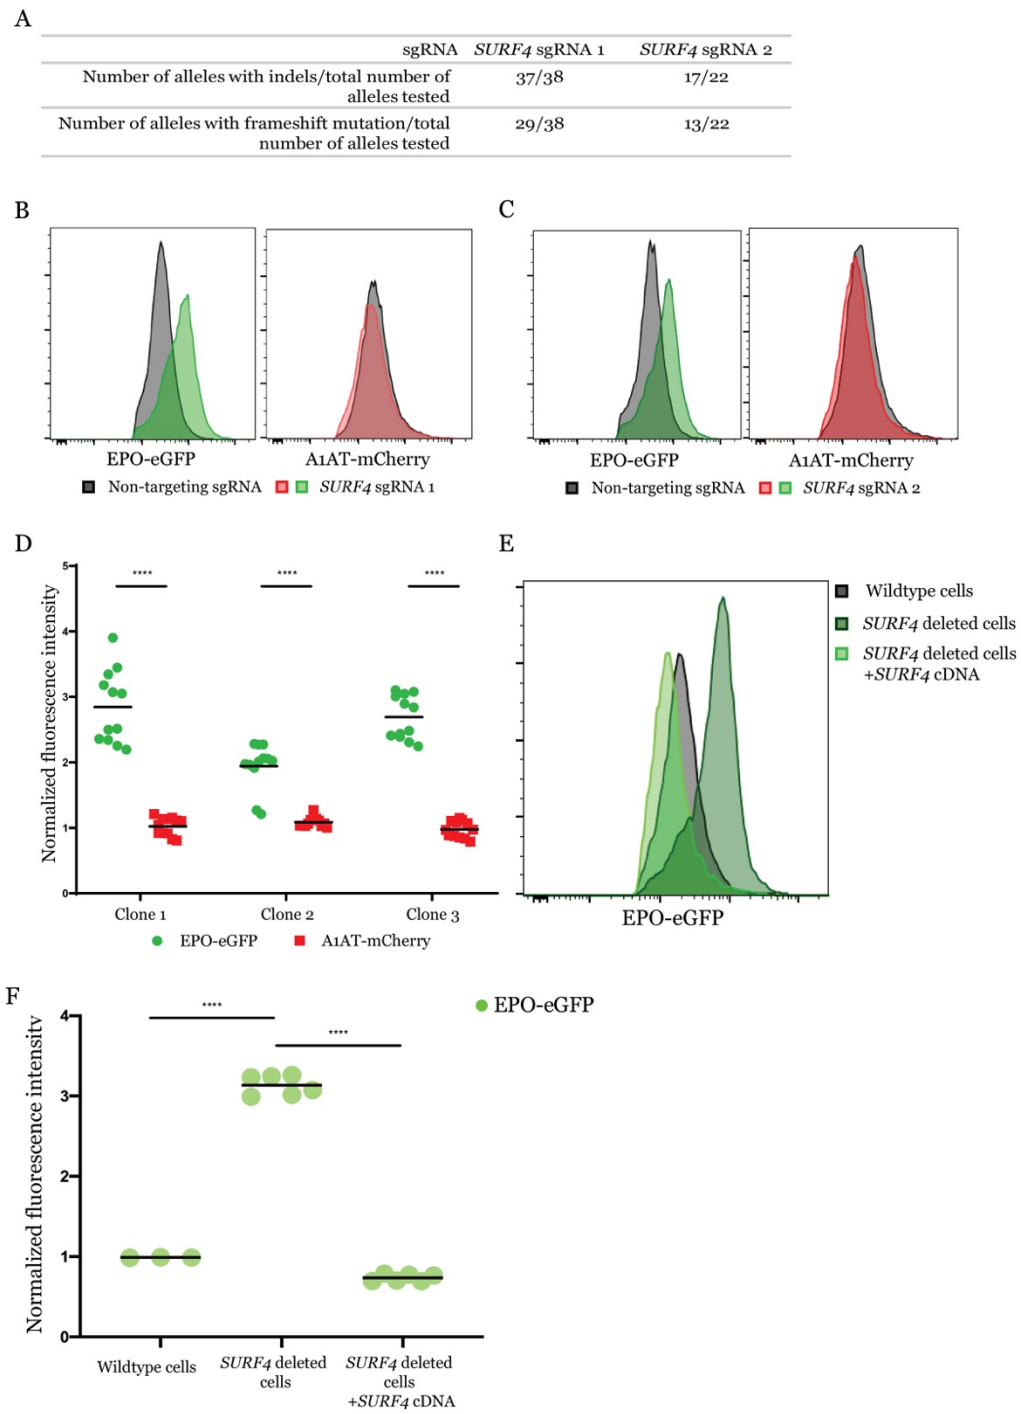

Fig. 4

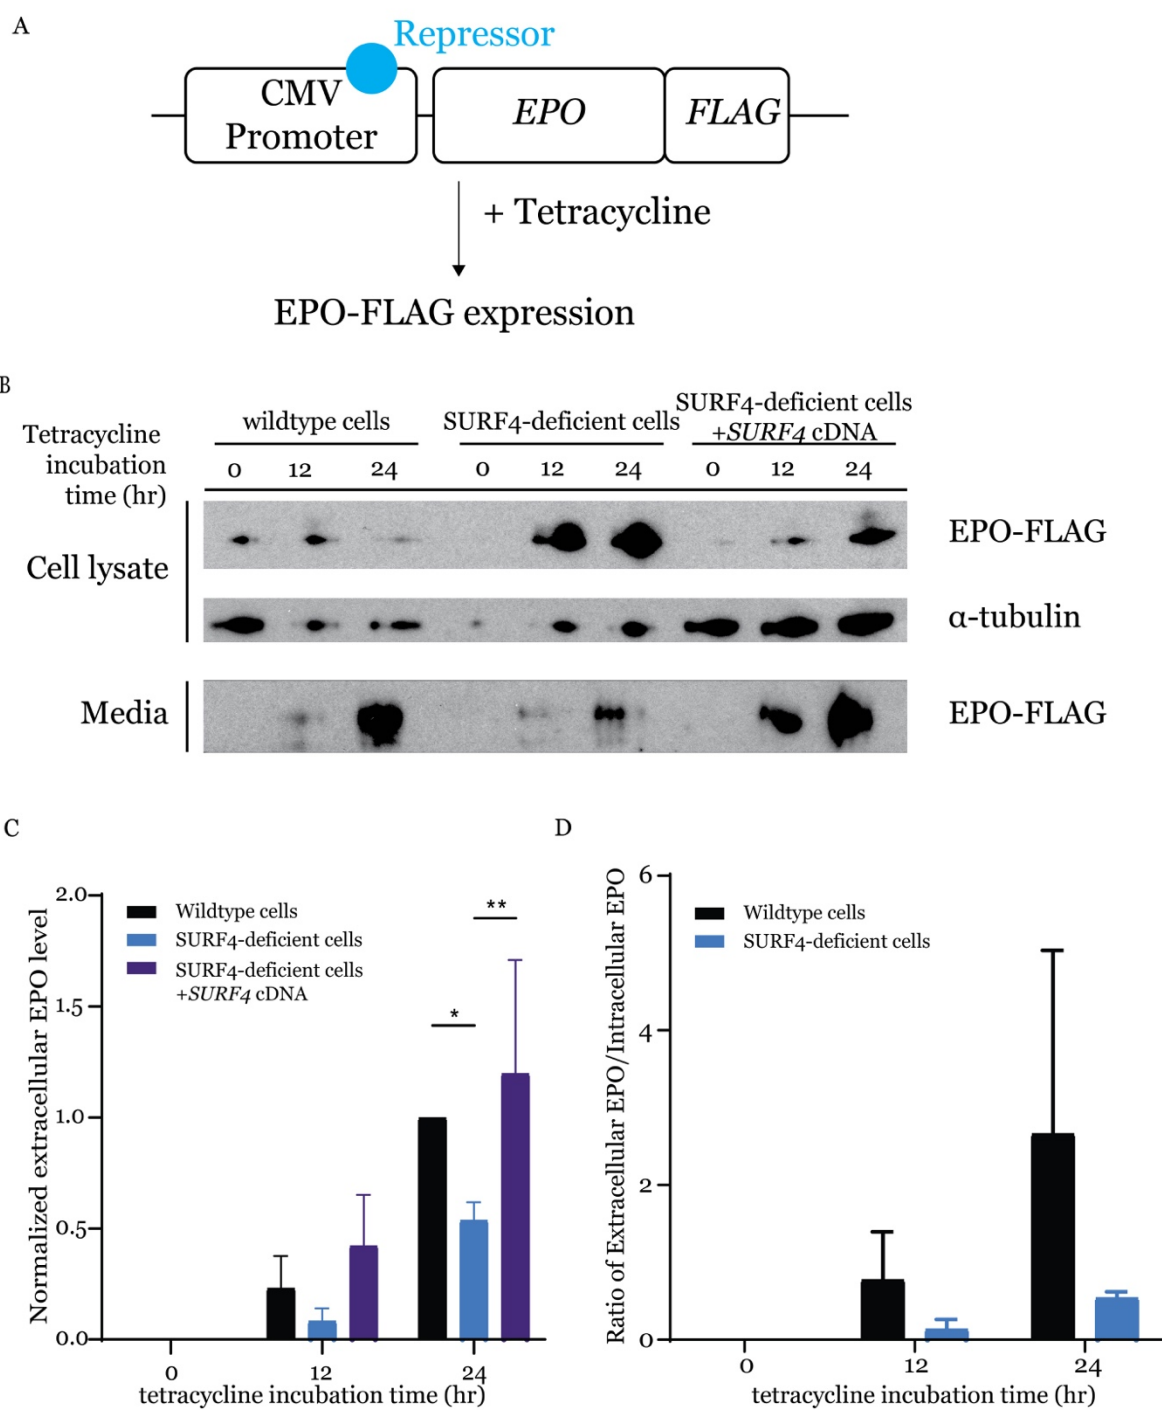

Fig. 5

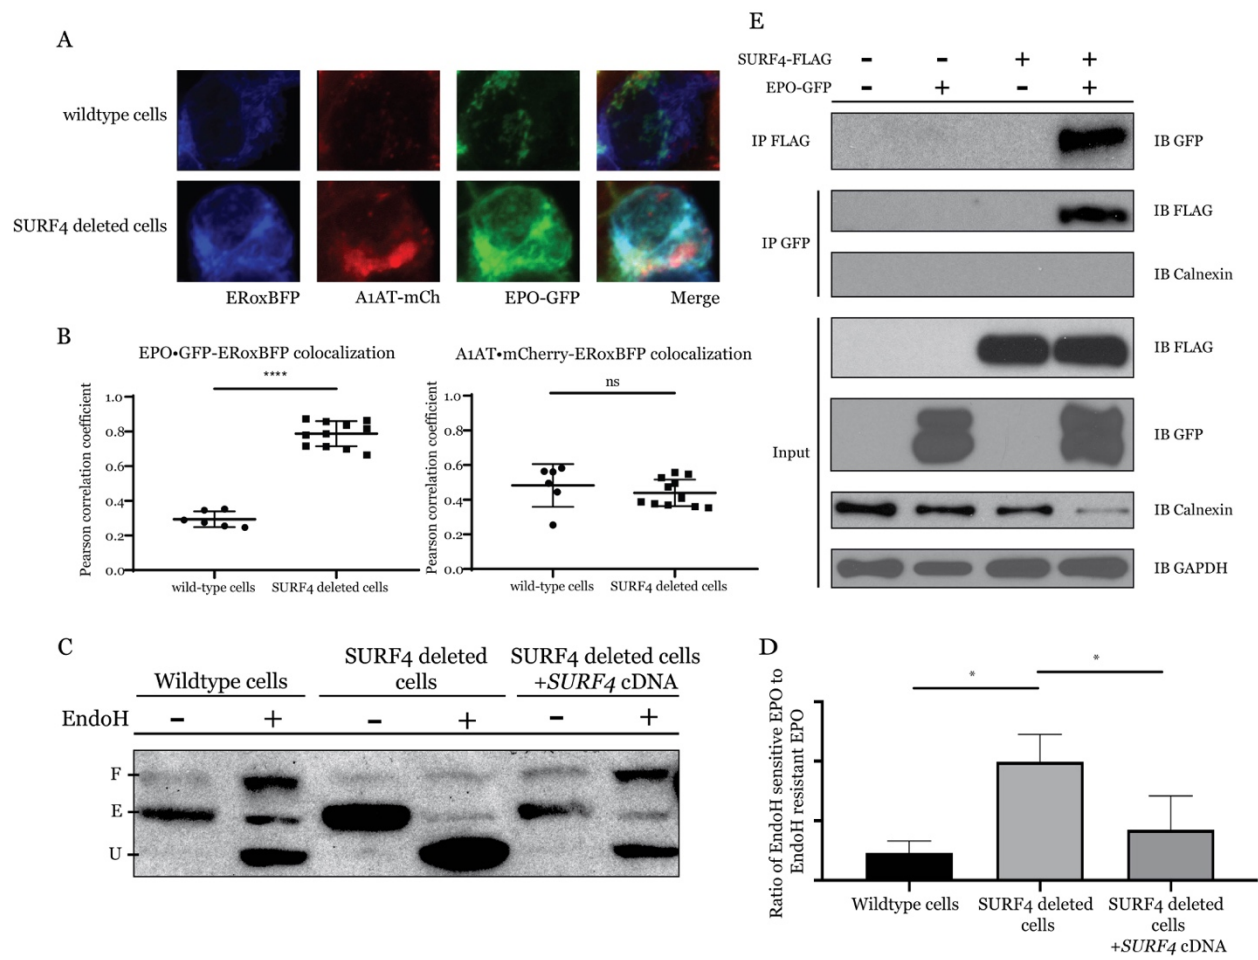

Fig. 6

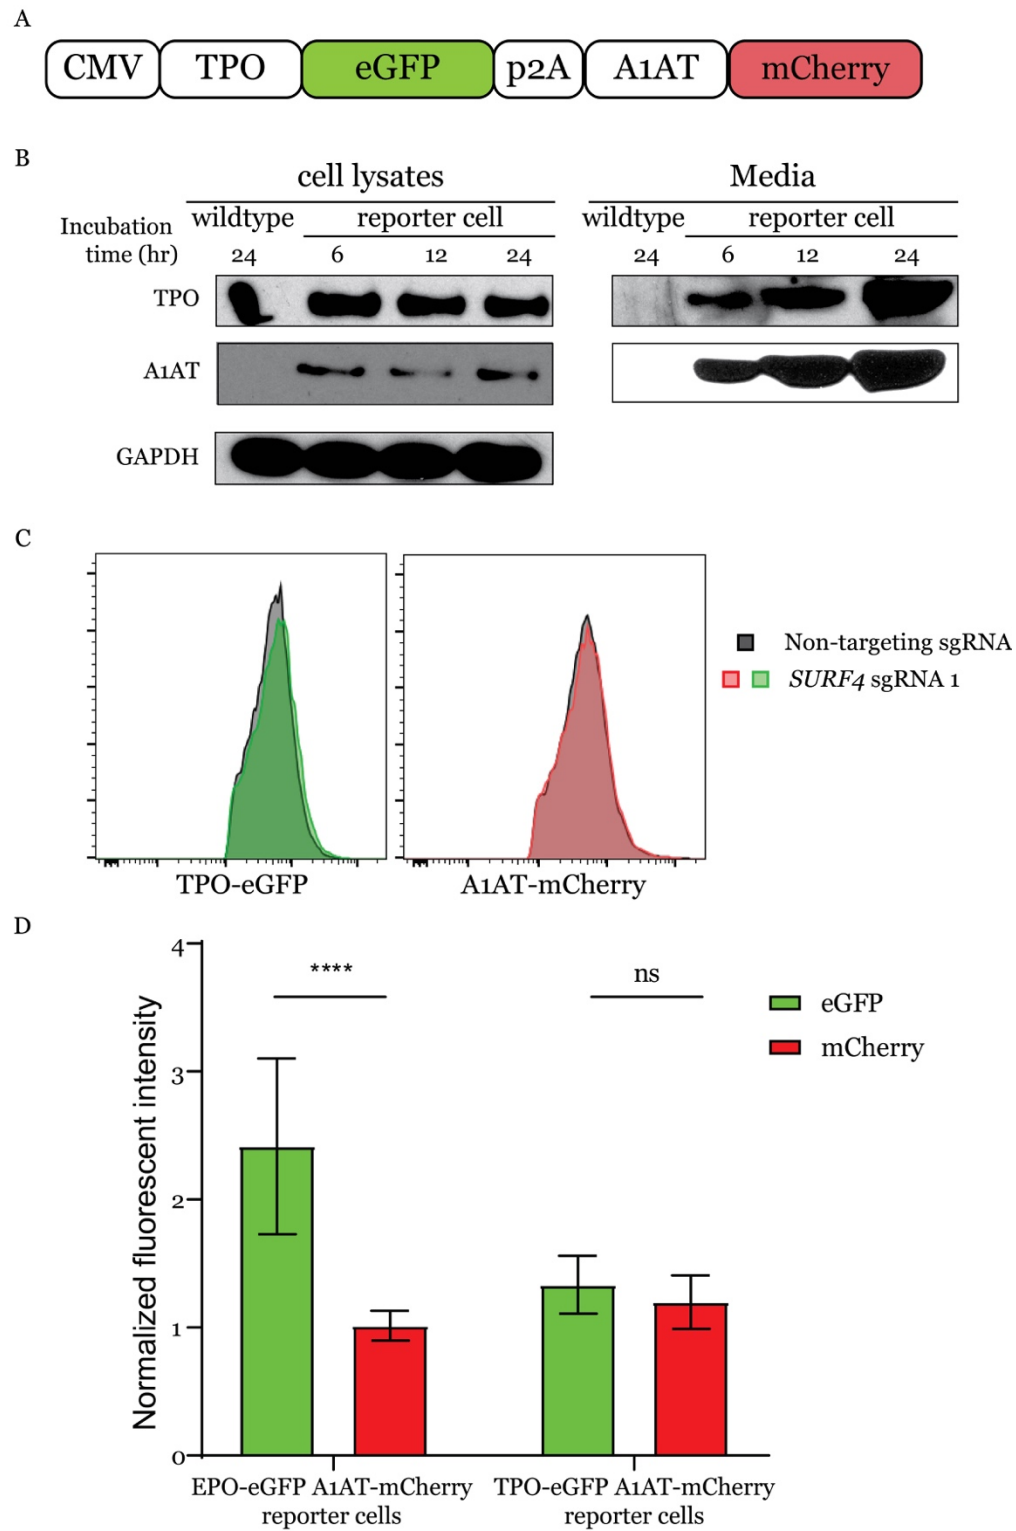





Fig. 8

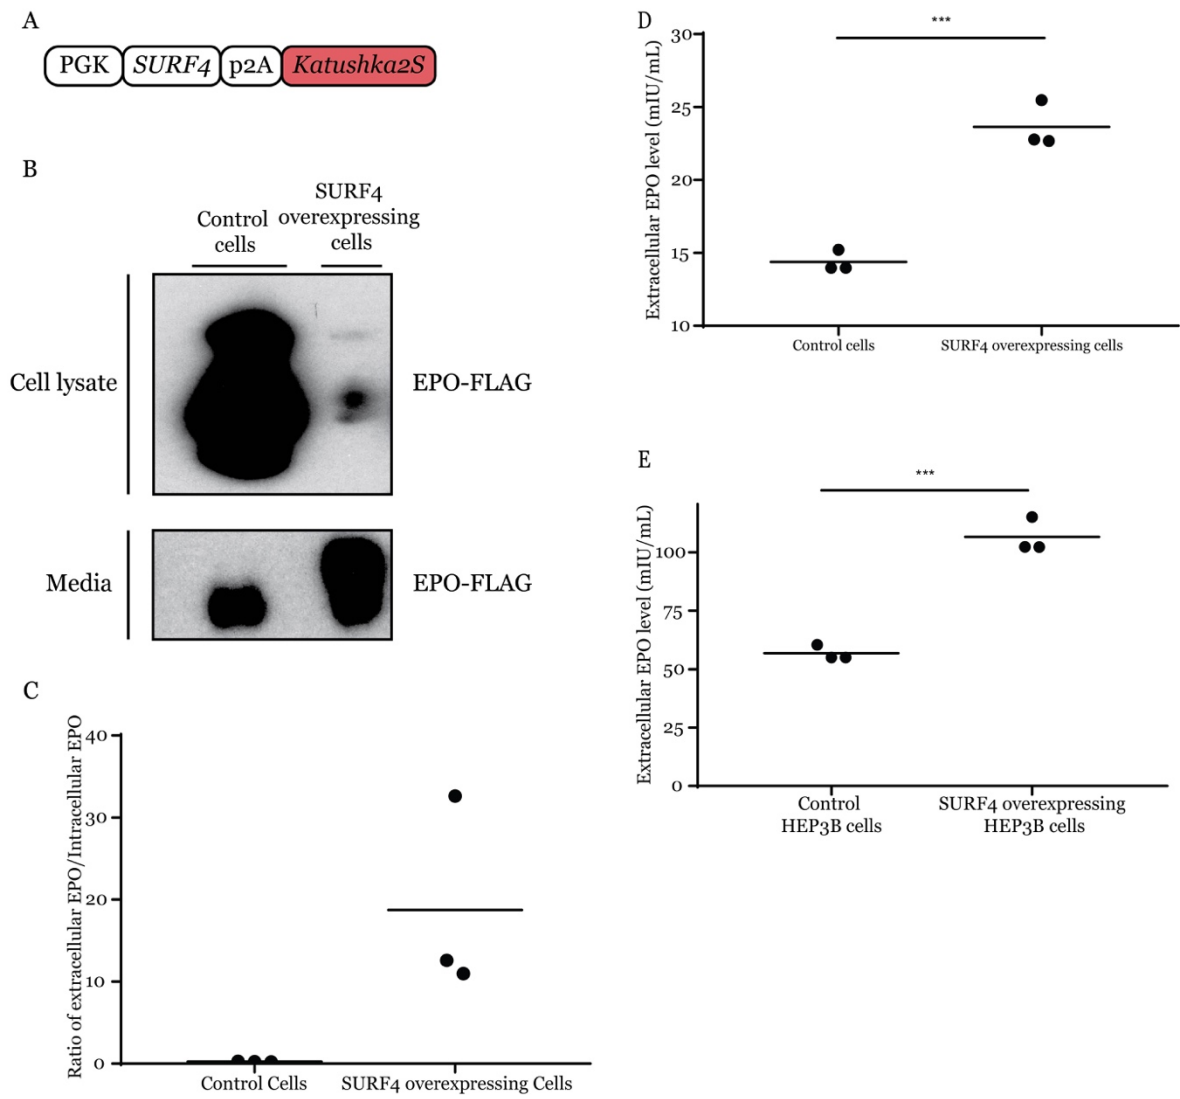

Source: https://biorxiv.org/content/biorxiv/early/2019/12/06/866954.full-text.pdf
